1                   **Domoic acid disruption of neurodevelopment and behavior**  
2                   **involves altered myelination in the spinal cord**

3  
4  
5                   Jennifer M. Panlilio,<sup>1,2,3,4</sup> Neelakanteswar Aluru,<sup>1,3</sup> Mark E. Hahn<sup>1,3</sup>

6  
7                   <sup>1</sup>Biology Department, Woods Hole Oceanographic Institution, Woods Hole, MA 02543

8                   <sup>2</sup>Massachusetts Institute of Technology (MIT) – Woods Hole Oceanographic Institution (WHOI)

9                   Joint Graduate Program in Oceanography and Oceanographic Engineering

10                   <sup>3</sup>Woods Hole Center for Oceans and Human Health

11                   <sup>4</sup>Current address: National Institutes of Health / NICHD, Laboratory of Molecular Genetics,

12                   Bethesda, MD 20892

13  
14                   **KEYWORDS:** Domoic acid; HAB toxins; developmental toxicity; windows of susceptibility;  
15                   startle response; myelination

16 **ABSTRACT**

17 Harmful algal blooms (HABs) produce potent neurotoxins that threaten human health. Early life  
18 exposure to low levels of the HAB toxin domoic acid (DomA) produces long-lasting behavioral  
19 deficits, but the mechanisms involved are unknown. Using zebrafish, we investigated the  
20 developmental window of susceptibility to low doses of DomA and examined cellular and  
21 molecular targets. Larvae exposed to DomA at 2 days post-fertilization (dpf), but not at 1 or 4  
22 dpf, showed consistent deficits in startle behavior including reduced responsiveness and altered  
23 kinematics. Similarly, myelination in the spinal cord was disorganized after exposure only at 2  
24 dpf. Time-lapse imaging revealed disruption of the initial stages of myelination. DomA down-  
25 regulated genes required for maintaining myelin structure and the axonal cytoskeleton. These  
26 results identify a developmental window of susceptibility to DomA-induced behavioral deficits  
27 involving altered gene expression and disrupted myelin structure, and establish a zebrafish model  
28 for investigating the underlying mechanisms.

29

30 GRAPHICAL ABSTRACT

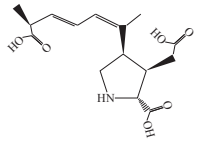

Domoic acid  
(0.09 -0.18 ng)

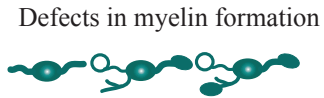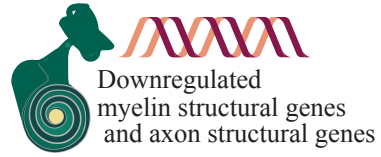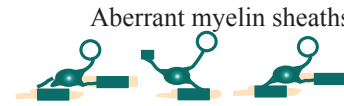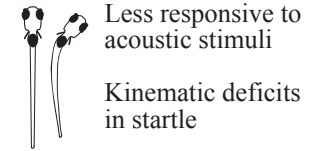

2 dpf

3 dpf

5 dpf

7 dpf

*\*not 1 or 4 dpf*

## 31 INTRODUCTION

32 Domoic acid (DomA) is a potent neurotoxin that is produced by diatoms in the genus *Pseudo-*  
33 *nitzschia*. DomA exerts its toxicity by binding to and activating ionotropic glutamate receptors,  
34 particularly the  $\alpha$ -amino-3-hydroxy-5-methyl-4-isoxazolepropionic acid (AMPA) and kainate  
35 (KA) subtypes.<sup>1</sup> Human exposure to DomA occurs primarily through the consumption of  
36 contaminated seafood. Acute exposure to high levels of DomA leads to amnesic shellfish  
37 poisoning, with symptoms ranging from mild gastrointestinal issues to memory loss, seizures,  
38 coma, and death.<sup>2-4</sup> To protect adults from these acute effects, regulatory limits of 20  $\mu$ g DomA  
39 per gram of shellfish tissue have been established.<sup>5,6</sup> However, seafood with measurable levels of  
40 DomA below these regulatory limits is still widely harvested and consumed. This may have  
41 important public health consequences, especially for exposures that occur during embryonic and  
42 early postnatal development when animals are often more sensitive to neurotoxicants.<sup>7-9</sup>

43

44 Research in animal models has demonstrated that developing animals are exposed to DomA and  
45 more sensitive than adults to DomA. For example, only one-tenth the dose of DomA is required  
46 to induce overt behavioral toxicity in postnatal rats compared to adults.<sup>10-12</sup> Even within the  
47 postnatal period, rats are generally more sensitive at earlier postnatal stages.<sup>12</sup> Both placental  
48 transfer and lactation are potential routes of DomA exposure during development. DomA readily  
49 crosses the placenta, making its way into the fetal brain and accumulating in fetal fluids.<sup>13,14</sup>  
50 Amniotic fluid can serve as a reservoir for DomA,<sup>15-17</sup> suggesting that fetuses could experience  
51 prolonged exposure to DomA following a single maternal exposure. DomA can also be  
52 transferred to breast milk. DomA has been measured in the milk of sea lions consuming DomA-  
53 contaminated prey.<sup>18</sup> In lactating rats injected with DomA, the toxin is detectable in both the  
54 maternal plasma and the milk,<sup>21</sup> and persists in the milk much longer than it does in the plasma.<sup>19</sup>

55

56 A wide range of lasting behavioral deficits can occur following either prenatal or postnatal  
57 exposure to DomA. These behavioral effects occur even at doses that do not lead to overt signs  
58 of toxicity either in mothers (in the case of prenatal exposures) or in the pups themselves (for  
59 postnatal exposures). Rodents exposed prenatally to DomA exhibit aberrant exploratory  
60 behaviors,<sup>20-22</sup> subtle motor coordination deficits,<sup>21</sup> and in some cases deficits in contextual  
61 learning.<sup>21,20</sup> Rodents exposed postnatally display seizures when exposed to novel

62 environments,<sup>11,23</sup> and also have aberrant drug-seeking behaviors as assessed by nicotine place  
63 preference tests.<sup>24,25</sup>

64

65 Together, these studies indicate that developmental exposure to DomA leads to lasting  
66 behavioral deficits.<sup>20–22</sup> However, the cellular and molecular mechanisms underlying these  
67 deficits are poorly understood. To elucidate these mechanisms, we used zebrafish as a model.  
68 Zebrafish have brain structures and sensory-motor pathways that are homologous to those of  
69 humans.<sup>26,27</sup> Furthermore, the transparency of zebrafish embryos and the availability of  
70 transgenic lines allow us to directly observe critical cellular processes during early  
71 development.<sup>28–31</sup> Moreover, larval zebrafish have simple behaviors that are driven by well-  
72 characterized neural circuits and comprised of known cell types, allowing us to link behavior to  
73 the underlying structural and cellular targets.<sup>32,33</sup>

74

75 The goal of this study was to identify the behavioral, structural, and transcriptional changes from  
76 low-dose exposures to DomA during critical periods in early development. Using intravenous  
77 microinjection, we were able to deliver single doses at specific developmental times that spanned  
78 late embryonic (1 day post fertilization, or dpf) to larval stages (4 dpf). We used the well-  
79 characterized startle response behavior to identify functional effects from domoic acid toxicity.  
80 To assess potential structural changes from exposures, transgenic lines that have fluorescently-  
81 labeled myelin sheaths were used to assess changes in myelin structures over time. Finally,  
82 transcriptional changes resulting from exposures were identified using RNA sequencing.

83

## 84 **RESULTS**

### 85 **Developmental exposure to DomA at 2 dpf affects responsiveness to auditory/vibrational** 86 **stimuli**

87 To elucidate the developmental windows of susceptibility to DomA, we established a zebrafish  
88 exposure model involving intravenous injection of DomA into embryos or larvae between 1 and  
89 4 dpf, and then assessed molecular, cellular, and behavioral endpoints at later times (3-7 dpf)  
90 (*Materials and Methods; Fig. 1A*).

91

92 Injection of DomA at low doses (0.09-0.14 ng) caused transient, acute effects that resolved  
93 within one day of exposure and did not lead to appreciable mortality (*Supplemental Results and*  
94 *Discussion; Supplemental Fig.1*).

95  
96 We assessed the functional impact of developmental DomA exposure by measuring startle  
97 response behavior during the larval stage (7 dpf) of development. We first assessed  
98 responsiveness—the ability of fish to react to auditory/vibrational (A/V) stimuli—by giving 7  
99 replicate stimuli and calculating the percent response for each fish. Fish exposed to DomA at 2  
100 dpf had reduced responsiveness to A/V stimuli at all doses tested (0.09-0.18 ng) ( $p < 0.001$ ) (Fig.  
101 2). Fish exposed to DomA at 1 dpf had reduced responsiveness when exposed to doses  $\geq 0.13$  ng  
102 ( $p \leq 0.001$ ), while those exposed to DomA at 4 dpf had reduced responsiveness only when  
103 exposed to the highest dose (0.18 ng) tested ( $p < 1e-4$ ). Fish exposed to DomA at 2 dpf were  
104 more sensitive than those exposed at 1 or 4 dpf as only fish exposed to DomA at 2 dpf had  
105 significantly reduced responsiveness to A/V stimuli at the lowest dose tested (0.09 ng).

106

### 107 **DomA exposure at 2 dpf affects startle response kinematics**

108 During the larval startle response, larvae perform a distinctive ‘c’ bend as the head and body  
109 bend together at a high angular velocity (Supplemental Video 1). Kinematics that underlie this  
110 ‘c’ bend include bend angle and maximal angular velocity (Mav), which we used to measure  
111 DomA-induced changes to startle kinematics. We evaluated kinematics for the two types of  
112 startle responses: short latency (SLC) and long latency (LLC) startle responses (Supplemental  
113 Fig. 2; *Materials and Methods*).

114

115 Exposure to DomA at 2 dpf led to consistent kinematic deficits at all doses tested and in all  
116 experimental trials. Fish exposed to DomA at 2 dpf had both reduced bend angles and slower  
117 maximal angular velocities relative to vehicle-injected controls; these behavioral deficits were  
118 evident with both SLC (Fig. 3) and LLC startle responses (Fig. 4).

119

120 In contrast to exposure at 2 dpf, exposure at 1 and 4 dpf to the lowest dose of DomA tested (0.09  
121 ng) did not lead to any kinematic deficits for either type of startle (SLC or LLC) (Figs. 3, 4). At  
122 higher doses (0.13 – 0.18 ng), exposure to DomA at 1 dpf led to kinematic deficits that differed

123 by startle response type. Fish exposed to DomA ( $\geq 0.13$  ng) at 1 dpf had reduced bend angles and  
124 slower maximal angular velocities, particularly when they performed the LLC startle responses  
125 (Fig. 4). These fish also had significant kinematic deficits when performing the SLC responses,  
126 but this was primarily in reductions to bend angle rather than slower maximal angular velocities  
127 (Fig. 3). Exposures to DomA at 4 dpf did not result in consistent effects on kinematics. For  
128 example, fish exposed to 0.18 ng DomA at 4 dpf had significantly reduced bend angles in only 1  
129 out of 3 trials (Fig. 3). Furthermore, the type of kinematic deficits varied across trials. In 1 of the  
130 3 trials, fish exposed to 0.18 ng DomA had reduced maximum angular velocities and bend angles  
131 with SLC startles but not LLC startles. In another trial, fish exposed to DomA at 0.13 ng had  
132 deficits in LLC kinematics but not SLC kinematics (Fig. 3 and 4). Thus, while exposures to  
133 DomA at all developmental stages tested (1, 2, and 4 dpf) resulted in some kinematic deficits at  
134 higher doses, only those at 2 dpf consistently led to kinematic deficits in all trials and across the  
135 entire range of doses tested.

136  
137 To directly compare the effect of both dose and day of exposure on startle kinematics, we  
138 performed a nonparametric multivariate factorial analysis on a subset of trials where fish from  
139 the same breeding cohort were exposed to DomA at 1, 2, and 4 dpf. We focused on LLC startles  
140 because these responses were shown by the previous analysis to be more sensitive to treatment  
141 differences. At the lowest dose of DomA (0.09 ng), startle kinematic parameters were  
142 significantly influenced by the interaction between treatment and day of exposure ( $F(2, 520)=$   
143  $21.6, p=9.6e-10$  for bend angle and  $-F(2, 520)=16.5, p=1.1e-7$  for Mav) (Supplemental Fig.  
144 3A). Treatment effects from exposure to DomA at 2 dpf were distinct from treatment effects  
145 from exposures at 1 or 4 dpf ( $p < 1e-3$ ). There were no differences in the effects of DomA from  
146 exposure at 1 dpf versus 4 dpf, and the kinematics were not significantly different between  
147 DomA-exposed fish and their respective controls at these two exposure times. Thus, at the lowest  
148 doses of DomA (0.09 ng), exposure at 2 dpf led to distinct kinematic deficits that were not found  
149 at 1 or 4 dpf.

150  
151 With exposure to the intermediate doses of DomA (0.13- 0.14 ng), the interaction between  
152 treatment and day of exposure remained significant for both bend angle ( $F(2, 474)=23.0$  ,  
153  $p=2.96e-10$ ) and maximal angular velocity ( $F(2, 474)=19.9$  ,  $p=4.84e-9$ ) (Supplemental Fig. 3B).

154 Similar to the results with the lowest dose of DomA, exposure to 0.13 ng DomA at 2 dpf led to  
155 significant kinematic deficits relative to exposures at 1 and at 4 dpf ( $p < 1e-5$ ). Additionally, fish  
156 exposed to intermediate doses of DomA at 1 dpf had reduced bend angles and maximum angular  
157 velocities, but these deficits were less pronounced compared to those following exposure at 2 dpf  
158 (bend angle comparison estimate between 1 dpf – 2 dpf = -140.9 ( $p = 4.35e-6$ ); maximal angular  
159 velocity comparison estimate = -147.92 ( $p = 1.57e-6$ )).

160

### 161 **DomA exposure at 2 dpf disrupts myelination in the spinal cord**

162 These startle response deficits could arise from myelin defects. Proper myelination is critical for  
163 rapid startle responses, and mutations that disrupt myelin structure cause reduced angular  
164 velocities, shallower bend angles, and increased latencies of startle.<sup>34</sup> To determine whether  
165 disrupted myelination underlies the DomA-induced deficits in startle response, we exposed fish  
166 with labelled myelin sheaths (*Tg(mbp:EGFP-CAAX)*<sup>35</sup>) to a range of DomA doses and then  
167 assessed myelination during the larval stages (Fig. 5A).

168

169 Exposed fish were imaged at 5 dpf using confocal microscopy (Fig. 5B). The severity of myelin  
170 defects was scored blindly on the scale of 0-4 (Fig. 5D and Supplemental Fig. 4). Exposure to  
171 DomA caused myelin sheath defects, the prevalence and severity of which were influenced by  
172 day of exposure (Fig. 5C,D). Fish exposed to DomA at 1 dpf had no visible myelin defects ( $n=$   
173 31). In contrast, 32% of fish exposed at 1.5 dpf had visible myelin defects ( $n = 11$  out of 34).  
174 Defects included the overall reduction in labeled myelin, along with the appearance of unusual  
175 circular membranes (Fig. 5B). The majority of fish (91%) exposed at 2 dpf showed myelin  
176 defects ( $n = 96$  out of 106). The prevalence of these defects remained high for fish exposed at 2.5  
177 dpf, with 35 out of 40 (88%) exhibiting a myelin defect. However, these myelin phenotypes were  
178 less severe, with 2.5 dpf-exposed larvae having milder myelin sheath defects compared to those  
179 exposed to 2 dpf. In comparison, very few fish exposed to DomA at 4 dpf had disrupted myelin  
180 sheaths ( $n= 2$  out of 46).

181

182 Confocal imaging data suggested that fish exposed at 2 dpf had more severe and more prevalent  
183 myelin defects compared to those exposed to DomA at other developmental periods. To confirm  
184 this, we performed additional experiments in which fish were exposed to DomA (at various



185 doses and times) and then imaged at 5 dpf using widefield epifluorescence microscopy (Fig. 6).  
186 This provided the increased throughput to statistically model the effects of DomA dose and the  
187 timing of exposure on the distribution and prevalence of the observed myelin sheath defects.

188

189 To determine whether the day of exposure influenced the appearance and prevalence of myelin  
190 defects, we performed a pairwise ANOVA test to compare an initial model, with only DomA  
191 dose as the predictor, to an alternative model with both dose and day of exposure as predictors.  
192 Incorporating the day of exposure significantly improved its predictive power ( $p < 1e-16$ ),  
193 indicating that timing of DomA exposure influenced myelin deficits.

194

195 We then determined whether DomA exposures that occurred during particular periods in  
196 development led to a higher prevalence of specific myelin defects. We found that the odds of fish  
197 exhibiting phenotypes from category 1-4 were higher when exposures occurred at 2, 2.5, and 3  
198 dpf relative to exposures that occurred at 1 dpf (Supplemental Table 22,  $p < 1e-7$  for 2 dpf  
199 exposed). Of these time periods, exposures at 2 dpf had the highest odds of having fish with  
200 these myelin defects.

201

202 To determine whether these myelin phenotypes observed at 5 dpf persist, fish were also imaged  
203 at 6 and 7 dpf (Fig. 7). Similar to imaging at 5 dpf, fish exposed to DomA at 2 dpf and then  
204 imaged at 6 or 7 dpf had a significantly higher incidence of myelin defects compared to control  
205 fish. Furthermore, the higher the dose of DomA (delivered at 2 dpf), the more likely it was for  
206 the fish to exhibit all of the myelin phenotypes observed (Fig. 7A and 7B). These results indicate  
207 that DomA exposure, particularly at 2 dpf, leads to myelin defects that persist for at least seven  
208 days after exposure.

209

### 210 **Time-lapse imaging shows that domoic acid perturbs the initial stages of myelin sheath** 211 **formation**

212 We observed very few myelination defects or behavioral phenotypes in larvae exposed to DomA  
213 at 4 dpf, a time point after the onset of myelination. This suggests that DomA does not affect  
214 established sheaths, but rather may perturb the formation of nascent myelin. DomA-exposed fish  
215 have perturbed myelin sheaths by 3 dpf (the earliest development period at which myelin sheaths

216 are established) (Fig. 8A). To directly visualize the initial stages of myelin sheath formation, we  
217 performed time-lapse imaging in double transgenic fish (*Tg:sox10:RFP; Tg:nkx2.2a:mEGFP*), in  
218 which cells of the oligodendrocyte lineage—the cells responsible for myelination in the central  
219 nervous system—are labeled. Imaging the axon wrapping and nascent myelin sheath formation  
220 from 2.5-3 dpf confirmed that oligodendrocytes in DomA-exposed larvae were unable to form  
221 elongated sheaths, but rather formed unusual circular membranes (n=5 for controls, n= 6 for  
222 DomA exposed larvae) (Fig. 8B, Supplemental Video 2, 3).

223

### 224 **Domoic acid exposure alters expression of genes involved in axonal growth and myelination**

225 To identify the gene expression changes that accompany the myelination and startle deficits,  
226 whole-embryo RNAseq was performed on embryos exposed to 0.14 ng DomA at 2 dpf and then  
227 sampled at 3 and 7 dpf (Fig. 9A).

228

229 RNA sequencing yielded an average of 21 million raw reads per sample. Of these, 77.6% were  
230 uniquely mapped to the zebrafish genome. A multidimensional scaling (MDS) plot revealed  
231 clustering by both developmental stage (3 dpf vs. 7 dpf) and breeding clutch (3 breeding trios)  
232 (Fig. 9B). This indicates that the differences in gene expression were driven primarily by  
233 developmental stage and breeding clutch. However, a number of genes were identified as being  
234 differentially expressed in response to DomA.

235

236 Statistical analysis revealed differential expression of 82 genes at 3 dpf (28 hours post exposure),  
237 and 10 genes at 7 dpf in DomA-exposed fish versus controls (Fig. 9 C, D). Among the 82 genes  
238 differentially expressed at 3 dpf, 51 genes were down-regulated and 31 were up-regulated in  
239 DomA-exposed larvae as compared to controls.

240

241 Pathway analysis of the differentially expressed genes (DEGs; DomA vs. control) indicated an  
242 overrepresentation of the GO biological process terms protein depolarization and microtubule  
243 depolarization. The genes represented under these GO terms include genes in the stathmin  
244 family. Two out of three stathmin genes were up-regulated, and one was down-regulated in  
245 DomA-exposed fish.

246

247 Significant human phenology phenotypes associated with the down-regulated genes included  
248 peripheral axonal degeneration, segmental peripheral demyelination/remyelination, and myelin  
249 outfoldings. Several genes required for the maintenance of axonal and myelin structure (*neflb*,  
250 *nefmb*, *nefma*, *nefla*, *mpba*, *mpz*) were downregulated in DomA-exposed fish relative to controls,  
251 and were overrepresented in the human phenology phenotypes (Fig.10). There were no human  
252 phenology phenotypes associated with up-regulated genes.

253

254 At 7 dpf, there were only ten DEGs, with 9 down-regulated and 1 up-regulated in DomA-  
255 exposed fish relative to the controls (Fig. 9D). Comparison of DEGs from 3 and 7 dpf revealed 4  
256 out of the 10 genes to be common to both the time points. Among these, 3 were down-regulated  
257 and 1 was up-regulated, with only 2 being annotated. Two of the three shared down-regulated  
258 genes were neurofilament genes required for maintaining axonal integrity (*nefmb* and *neflb*).

259

## 260 **DISCUSSION**

261 It is well known that early development is a period of enhanced sensitivity to effects of DomA  
262 exposure, and that low-doses of DomA can lead to persistent behavioral deficits<sup>10–12,20–22,24,25</sup>.  
263 However, the mechanisms that underlie these changes are largely unknown. This study identified  
264 the period around 2 dpf as a window of susceptibility to DomA neurodevelopmental toxicity and  
265 then characterized the resulting molecular, structural, and behavioral consequences of exposures  
266 during this period. Exposure to DomA during this window led to changes in gene expression,  
267 disruption of myelin sheath formation in the spinal cord, and aberrant startle behavior.

268

### 269 **A novel exposure method uncovers a window of susceptibility to low doses of DomA**

270 This study established zebrafish as a model for investigating the mechanisms of toxicity from  
271 low-dose exposures to DomA during development. Previous developmental DomA exposure  
272 studies in zebrafish were done by injecting DomA into the yolk during the early embryonic  
273 stages (512-1000 cell stage).<sup>36,37</sup> However, the DomA doses that led to behavioral phenotypes  
274 were also those that resulted in high mortality rates and lasting neurotoxic symptoms. To build  
275 on this work, we used a novel exposure method in which DomA was delivered intravenously at  
276 different periods in development – from the embryonic to the larval stages. Using this method,  
277 we were able to find a window of susceptibility for low doses of DomA (nominal doses 3- to

278 260-fold lower than those used previously) at which structural and behavioral effects occurred  
279 with no appreciable mortality and minimal gross morphological defects. In particular, the period  
280 around 2 dpf was identified as the window of susceptibility for nominal doses of DomA that  
281 ranged from 0.09-0.14 ng per embryo.

282

### 283 **Startle response deficits are dependent on dose and timing of exposure**

284 Startle response behavior was used as a functional read out of developmental neurotoxicity. Fish  
285 exposed to DomA at 2 dpf (but not 1 and 4 dpf) had aberrant startle behavior at all doses tested  
286 (0.09-0.18 ng). In particular, fish exposed to DomA at 2 dpf had reduced responsiveness,  
287 increased latency, slower maximal angular velocities, and lower bend angles relative to controls  
288 (Figs. 2-4). This suggests that there is a window of susceptibility to low-dose (< 0.18 ng) DomA  
289 exposure at around 2 dpf that leads to a functional change in behavior.

290

### 291 **Exposure to DomA at 2 dpf disrupts myelin formation**

292 Similar to the behavioral results, only fish exposed at 2 dpf (but not 1 or 4 dpf) showed  
293 consistent defects in myelination within the spinal cord (Figs. 5B,C, 6B). DomA-exposed larvae  
294 had an overall reduction in labeled myelin, along with the appearance of unusual circular  
295 membranes (Figs. 5B, 6B). These deficits were visible as early as 3 dpf, when nascent myelin  
296 sheaths are present (Fig. 8), and persisted until at least 7 dpf, indicating that initial formation of  
297 myelin is perturbed and does not recover within 4 days post-exposure (Fig. 7).

298

### 299 **The window of susceptibility to DomA corresponds to the critical period for** 300 **oligodendrocyte development**

301 It is possible that 2 dpf is the window of susceptibility because DomA perturbs specific  
302 developmental processes that occur within this time period. While most of the early neurons  
303 have already differentiated by 2 dpf, the oligodendrocyte lineage – the lineage that myelinates  
304 axons in the central nervous system – is just beginning to migrate and differentiate during this  
305 period.<sup>38,39</sup> DomA exposure at 2 dpf may perturb critical processes in oligodendrocyte  
306 development, leading to the observed disrupted myelination.

307

308 Both myelinating oligodendrocytes and their precursors express functional ionotropic glutamate  
309 receptors, making them potential cellular targets for DomA.<sup>40,41</sup> Previous studies have shown that  
310 kainate, a structural analog of DomA, causes cell death in oligodendrocyte primary cell cultures,  
311 at concentrations comparable to those affecting neurons.<sup>42-45</sup> Binding to and activating AMPA  
312 receptors inhibits the proliferation and differentiation of oligodendrocyte precursor cells into  
313 mature oligodendrocytes *in vitro*.<sup>46,47</sup> Mature oligodendrocytes have also been shown to undergo  
314 demyelination after chronic direct infusion of kainate on the optic nerves.<sup>48</sup> All of this suggests  
315 that DomA may alter oligodendrocyte development, and that exposure to DomA at 2 dpf may  
316 disrupt critical processes important for OPC proliferation, differentiation, or myelin sheath  
317 formation.

318  
319 Only one previous study has assessed myelin following developmental exposure to DomA.  
320 Eleven week-old juvenile mice exposed *in utero* during gestational days 11.5 and 14.5, but not  
321 17.5, had a reduced staining for the myelin-associated glycoprotein (MAG) in their cerebral  
322 cortices.<sup>20</sup> This suggests that there may be periods in early development that are more sensitive  
323 to exposure to DomA, leading to these myelination deficits. Indeed, it is possible that sensitivity  
324 at the early periods is due to disruptions in oligodendrocyte development, thereby altering their  
325 ability to form myelin sheaths during the postnatal period.<sup>49,50</sup> Our findings extend this work by  
326 identifying altered myelination in the spinal cord and revealing that DomA does not disrupt  
327 already established myelin sheaths but rather perturbs the initial formation of the sheaths during  
328 a specific window in development. Consistent with this, we saw very few myelin defects when  
329 DomA exposure occurred at 4 dpf – a time point after nascent myelin has been established (see  
330 below).

331

### 332 **Extrinsic factors that may influence the critical window for DomA toxicity**

333 In zebrafish, 4 dpf is a time period at which myelin sheaths are already established. The absence  
334 of a myelin phenotype following exposures at 4 dpf suggests that DomA, at least at the doses  
335 used here, may not disrupt already established sheaths but rather may perturb the initial  
336 formation of myelin sheaths. Time-lapse imaging of the initial stages of axon wrapping and  
337 nascent myelination (from 2.5-3 dpf), provides additional evidence that DomA affects the ability  
338 of oligodendrocytes to initially wrap axons and form elongated myelin sheaths (Fig. 8B).

339

340 In addition to the intrinsic sensitivity of developing oligodendrocytes, it is likely that the 2 dpf  
341 window of susceptibility is also influenced by extrinsic factors that affect the distribution and  
342 availability of DomA to the cells and tissues of interest. One process that may influence DomA  
343 availability in the central nervous system is the development of the blood-brain barrier (BBB) –  
344 a structure that separates the blood from the brain parenchyma.<sup>51</sup> The BBB is composed of tight  
345 junctions between endothelial cells that seal the intercellular cleft and prevent the diffusion of  
346 water-soluble molecules.<sup>52–54</sup> As the BBB forms between 3-10 dpf, it progressively excludes  
347 smaller molecules over time. Thus, DomA may be excluded from the central nervous system to a  
348 greater degree during developmental periods past 2 dpf as the BBB matures.

349

350 DomA may also be less accessible to cell targets of interest later in development due to relatively  
351 higher excretion rates as the kidney matures. DomA is primarily cleared from the plasma via the  
352 kidneys, and nephrectomies in rodent models increase the plasma half-life of DomA.<sup>55–57</sup> In  
353 zebrafish, glomerular filtration begins at around 2 dpf, while full maturation of the kidney occurs  
354 by 4 dpf.<sup>58,59</sup> Thus, DomA may be more readily cleared during periods in development after 2  
355 dpf.

356

### 357 **Transcriptional changes suggest defects in axon and myelin structures**

358 RNAseq analysis identified genes and pathways that were consistent with the imaging and  
359 behavioral data. DomA exposure down-regulated genes required for maintaining myelin  
360 structure, including myelin protein zero (*mpz*) and (*mbpa*), along with genes required for  
361 maintaining axonal structure (*nefla*, *neflab*, *nefma*, *nefmb*) (Fig. 10). Thus, it is possible that  
362 DomA may be primarily targeting axons, and that the myelination defects may be a secondary  
363 effect. Alternatively, DomA may perturb oligodendrocyte development and myelin wrapping,  
364 leading to later axonal dysfunction. Further work is underway to investigate the potential axonal  
365 targets of DomA toxicity and to assess the contribution of the axonal disruptions to the myelin  
366 sheath phenotypes that we characterized here.<sup>60</sup>

367

368 RNAseq data show an increase in glial fibrillary acidic protein (*gfap*) expression following  
369 exposure to DomA. *gfap* is an intermediate filament protein whose upregulation in mammals is a

370 hallmark of reactive gliosis – the response of glial cells following mechanical injury,  
371 excitotoxicity, or ischemia.<sup>61,62</sup> In zebrafish, *gfap* expression is delayed following mechanical  
372 injury, and is expressed during the proliferation and recovery stages.<sup>63–65</sup> The upregulation of  
373 *gfap* at 3 dpf suggests that exposure to DomA at 2 dpf may lead to injury and trigger repair  
374 mechanisms associated with increased *gfap* expression.

375

376 In addition, stathmin genes were overrepresented in our dataset. Stathmins destabilize  
377 microtubules by sequestering free tubulin. They are highly expressed in the developing nervous  
378 system and play critical roles in modulating neurite outgrowth and branching.<sup>66,67</sup> It has been  
379 shown that the dysregulation of different stathmin genes (either through down- or up-regulation)  
380 can lead to alterations in microtubule density and axonal integrity.<sup>67–69</sup>

381

## 382 **Implications for human health**

383 *Timing and targets.* This study provides a careful examination of potential windows of  
384 susceptibility to DomA exposure. The identification of key processes disrupted during these  
385 windows of susceptibility has important implications for identifying hazards for early  
386 developmental exposures in humans. Unlike in zebrafish, myelination in humans occurs over a  
387 prolonged period, starting *in utero* and continuing into early childhood and adolescence. The  
388 progression of myelination is mostly conserved across species, with myelination commencing in  
389 the periphery, brainstem, and spinal cord, then progressing rostrally to the forebrain.<sup>70,71</sup> The  
390 most widespread and rapid period of myelination in humans occurs within the first two years of  
391 infancy.<sup>72,73</sup> While most of the major tracts are myelinated by 3-5 years of age, myelination is  
392 now known to continue into adulthood, especially in cortical regions where changes in  
393 myelination are associated with experience and learning new skills.<sup>74,75</sup> Thus, for humans, there  
394 may not be a single window of susceptibility, but rather multiple windows; domoic acid may  
395 perturb myelin formation in specific regions of the nervous system in which myelination  
396 coincides with the timing of exposures.

397

398 In this study, we showed that myelination was perturbed in the spinal cord – an understudied  
399 target tissue for domoic acid toxicity. Only one other study in rodents has investigated the spinal  
400 cord as a target tissue for DomA exposures. Wang et al. (2000) found that postnatal exposures to

401 high doses of DomA led to spinal cord lesions by 2 hours post exposure, even in the absence of  
402 any histological damage to selected brain regions, including the well-known target, the  
403 hippocampus.<sup>76</sup> Our study confirms the spinal cord as a potential target, and identifies  
404 myelination as the process perturbed in the spinal cord.

405  
406 *Behavioral analogies.* We used startle response behavior as a functional readout of  
407 neurodevelopmental toxicity. Deficits in the kinematics of startle responses are reminiscent of  
408 motor deficits found in incidental human exposures, chronic exposures in primates, and  
409 developmental exposures in rodents. Adult humans acutely exposed to DomA developed  
410 sensorimotor neuropathy and axonopathy as assessed by electromyography.<sup>77</sup> A subset of the  
411 primates exposed orally at or near the accepted daily tolerable dose of 0.075 mg/kg developed  
412 visible hand tremors.<sup>78</sup> Rodents prenatally exposed to DomA (PND 10-17) developed aberrant  
413 gait patterns including impaired interlimb coordination and aberrant step sequence patterns.<sup>21</sup>

414  
415 While there is evidence that DomA can perturb motor function, developmental exposures to  
416 DomA in rodents have not led to reductions in startle response amplitude during baseline  
417 conditions (prior to habituation or pre-pulse inhibition tests).<sup>21,79-81</sup> This may be because  
418 exposures to DomA in these rodent models were done during a period that does not correspond  
419 to development of the startle circuit. Furthermore, there are some notable differences between  
420 rodent and fish startle, including distinct baseline startle kinematics and variations in the specific  
421 neuronal subsets in the circuits.<sup>82-84</sup> Despite these differences, measuring startle response  
422 behavior in fish provides a tool to assess sensory processing and motor control and how these  
423 processes are perturbed by toxin exposure.

424  
425 *Doses and toxicokinetics.* In all previous studies involving developmental exposure to DomA,  
426 ‘low doses’ have been defined based on the absence of acute neurotoxic symptoms, rather than  
427 by a specific dose. ‘Low doses’ are those that do not lead to classic acute symptoms that include  
428 tremors, scratching, and convulsions either in mothers (prenatal exposures) or in the pups  
429 directly exposed to DomA (postnatal exposures). While our study used nominal doses that were  
430 3- to 260-fold lower than those used previously in zebrafish, these doses still led to transient  
431 neurotoxic effects in embryos. However, when directly comparing the weight-normalized



432 amount of DomA, these doses are comparable to those used in the majority of the postnatal  
433 rodent studies.<sup>11,23,79,80,85-88</sup> Assuming a 1.4 mg wet weight per embryo,<sup>36</sup> the dosages at which  
434 embryos consistently exhibited myelin defects and behavioral deficits were 0.06-0.10 mg/kg  
435 DomA. In comparison, rodents who showed behavioral deficits following postnatal exposure  
436 were dosed subcutaneously with 7 injections of 0.005 and 0.020 mg/kg DomA between PND 8-  
437 14, leading to a comparable cumulative DomA dosage of 0.035-0.14 mg/kg.

438  
439 The main challenge for translating findings in animal models to humans is the dearth of human  
440 exposure and toxicokinetic data. Human exposures to DomA are only estimated from  
441 consumption data, average weights of adults, and measured DomA concentrations in shellfish.  
442 Furthermore, the toxicokinetic behavior of DomA in humans is not well known. However, work  
443 in nonhuman primates shows that oral exposures to DomA lead to extended half-lives (almost  
444 10x the length of the half-life following intravenous exposures).<sup>89</sup> Furthermore, chronic exposure  
445 at or near the recognized tolerable daily intake level (0.075 and 0.150 mg/kg) leads to persistent  
446 hand tremors and disruptions to whole-brain connectivity.<sup>78</sup>

447  
448 Even less information exists about the elimination and distribution in DomA in fetuses when  
449 mothers are exposed to DomA. One study in rodents showed that at one hour following  
450 intravenous injection of Dom A at GD13, the same concentrations of DomA were found in fetal  
451 brains, amniotic fluid, and maternal brains.<sup>13</sup> This suggests that earlier in development there are  
452 no barriers for DomA entry to the fetal brain and that DomA in the fetal brain reaches  
453 equilibrium concentrations with DomA in the amniotic fluid. Emerging evidence from marine  
454 mammals shows that DomA can remain in the fetal fluids (amniotic and allantoic fluids) over  
455 prolonged periods of time.<sup>16,17</sup> Thus, DomA may be recirculated within the fetal fluid  
456 compartments, allowing for continuous exposures in fetuses, even when maternal plasma has  
457 reached undetectable levels of DomA.

458

## 459 **CONCLUSIONS**

460 DomA is a well-known developmental neurotoxin. However, few studies have been able to  
461 identify the cellular and molecular processes that underlie the observed behavioral deficits seen  
462 following developmental exposures. Using zebrafish, we were able to deliver DomA at specific

463 developmental times and link behavioral deficits to structural changes in the neural circuit  
464 required for the behavior. The results from this study show that there is a critical window of  
465 susceptibility to DomA, and that exposure leads to altered expression of key axonal and myelin  
466 structural genes, disruptions to myelination, and later perturbations to startle behavior. These  
467 results establish the zebrafish as a model for investigating the cellular and molecular mechanisms  
468 underlying DomA-induced developmental neurotoxicity.

469

## 470 **MATERIALS AND METHODS**

### 471 **Fish husbandry and lines used**

472 These studies were approved by the Woods Hole Oceanographic Institution Animal Care and  
473 Use Committee (Assurance D16-00381 from the NIH Office of Laboratory Animal Welfare).  
474 Fish were maintained in recirculating tank systems that were specifically designed for zebrafish  
475 culture (Aquatic Habitats Inc., Apopka, FL). Temperature, lighting, and water quality were  
476 monitored daily and maintained according to recommendations from the Zebrafish International  
477 Resource Center. Fish were fed twice daily, once with live brine shrimp and once with the pellet  
478 feed Gemma Micro 300 (Skretting Inc., Tooele, UT). The afternoon before breeding, males and  
479 females were separated with a divider. The morning of the breeding, dividers were removed, and  
480 embryo collectors – containers with mesh on the top that let embryos filter to a catch basin –  
481 were placed in tanks with multiple breeding pairs for batch breeding unless otherwise noted.  
482 Embryos were collected and placed in petri dishes or in individual wells in a multi-well plate  
483 with 0.3x Danieau's medium. Embryos were maintained at 28.5°C with a 14:10 light dark cycle  
484 during the experimental period.

485

486 The transgenic line *Tg(mbp:EGFP-CAAX)*<sup>35</sup> in the AB background was used for behavioral,  
487 RNAseq, and myelin labeling experiments, while the double transgenic, *Tg(nkx2.2a:mEGFP)*,<sup>90</sup>  
488 *Tg(sox10:RFP)*,<sup>91</sup> was used for time lapse microscopy experiments.

489

### 490 **Domoic acid exposure paradigm**

491 An initial pilot study was performed in which zebrafish embryos were exposed to DomA  
492 solutions (5- 40 µM waterborne exposures). The absence of expected acute neurotoxicity even at  
493 high concentrations (data not shown) raised questions about whether DomA was being taken up

494 by the embryos. Because of this, and to more precisely control the timing of exposure, we  
495 decided to use microinjection as the route of exposure.

496

497 Domoic acid was obtained in a 5 mg vial from Sigma-Aldrich, MO (D6152), and dissolved  
498 directly in the vial with diluted embryo medium (0.2x Danieau's) to obtain a 20 mM solution.

499 This was immediately used to generate stock concentrations of 0.675  $\mu\text{g}/\mu\text{l}$  and 1.4  $\mu\text{g}/\mu\text{l}$ .

500 Aliquots (10  $\mu\text{L}$  each) were stored at  $-20^{\circ}\text{C}$ . Experiments were completed within 16 months of  
501 generating the stock. Working solutions were prepared fresh prior to microinjection by diluting  
502 the stock to obtain the appropriate doses. Microinjection needles were created from glass  
503 capillary tubes (058 mm inner diameter; World Precision Instruments, 1B100F-4) using a pipette  
504 puller (Sutter instrument model p-30, heat 750, pull= 0). Microinjections were performed using a  
505 Narishige IM-300 microinjector. The microinjector was calibrated to deliver 0.2 nL by adjusting  
506 the time (milliseconds) and pressure.

507

508 To determine the window of susceptibility for exposure at lower doses, DomA (0.09, 0.13, 0.14,  
509 0.18 ng nominal dose) was intravenously microinjected into the common posterior cardinal vein  
510 at different developmental stages.<sup>92</sup> Controls from the same breeding cohort were injected with  
511 the saline vehicle (0.2x Danieau's). Supplemental Table 1 includes the developmental time  
512 ranges for each injection category. To perform intravenous microinjections, fish were  
513 dechorionated, anesthetized with tricaine methanesulfonate (MS222) (0.16%) then placed  
514 laterally on dishes coated with 1.5% agarose. An injection was deemed successful if there was a  
515 visible displacement of blood cells. Following injections, zebrafish were placed back in clean  
516 embryo media and monitored daily.

517

### 518 **Assessment of gross morphological defects and acute neurological phenotypes**

519 Subsets of fish were imaged using brightfield microscopy to visualize potential gross  
520 morphological defects. The presence or absence of the swim bladder was scored blindly and then  
521 percentage was quantified for fish exposed to DomA at different doses and during different  
522 developmental stages. Images were white balance-corrected using Adobe Photoshop.

523

524 In a subset of the experiments, fish were kept individually in 48-well plates for phenotypic  
525 observation. Any mortalities, presence or absence of convulsions, pectoral flapping, and touch  
526 responses were recorded daily from the day after exposure to 5 dpf. Larvae were considered  
527 convulsing when whole body contractions were observed. Pectoral fin flapping was scored when  
528 larvae continued to rapidly move pectoral fins even when the fish were not actively swimming or  
529 attempting to right themselves. Touch responses were assessed using a tactile stimulus produced  
530 by an ‘embryo poker’ – a piece of fishing line (0.41 mm diameter) glued to a glass pipette tip.  
531 Larvae were identified as having no touch response when they were unable to perform body  
532 bends and swim away following tactile stimulation.

533

### 534 **Modeling the prevalence of neurotoxic phenotypes by dose, day of exposure, and day of** 535 **observation.**

536 Following daily observation, generalized estimating equations (GEE) were used to model the  
537 effects of both DomA dose (as a continuous factor) and the number of days post-exposure  
538 (categorical factor) on the presence of acute neurological phenotypes (convulsions, pectoral  
539 flapping, and the lack of touch responses) (`gee()`, `geepack` R package).<sup>49</sup> Observations of the  
540 same fish over multiple days were treated as repeated measures and were clustered by the “id”  
541 term. Separate GEE models were created for exposure to DomA at two developmental periods (1  
542 and 2 dpf).

543

544 There were only single observations for fish exposed at 4 dpf (observed at 5 dpf) . To determine  
545 whether DomA dose alters the presence of neurotoxic phenotypes one day post-exposure, a  
546 generalized linear model was formulated containing the different doses as predictors, and the  
547 presence of phenotypes as the response. To account for variability amongst trials, dispersion was  
548 estimated using the quasibinomial link function rather than the binomial one.

549

### 550 **Startle behavior set-up**

551 The custom-built startle behavior set-up is shown in Fig 1B. The system includes a speaker  
552 (Visaton BG20-8 8" Full-Range Speaker with Whizzer Cone, #292-548) connected to an  
553 amplifier (100W TDA7498 Class-D Amplifier Board, #320-303) which serves as a source of  
554 auditory/vibrational stimuli. A hollow cylinder with a flat base was 3D printed and glued to the

555 center of the speaker. This served as a platform to rest the plate that contained the fish (radius=  
556 50 mm, height = 50mm). A 16-well acrylic plate (4.83 x 4.83 cm) was then designed to contain  
557 16 larvae individually. This plate was based on a design from Wolman et al. (2011) that was  
558 comprised of laser cut acrylic pieces that were fused together using acrylic cement (Weld-On #3;  
559 IPS).<sup>94</sup>

560

561 The intensity and frequency of the auditory/vibrational stimuli were controlled using a pulse  
562 generator (PulsePal, Sansworks). Stimuli were coded to deliver 3 millisecond pulses of 1000 Hz  
563 frequency.

564

565 Groups of 16 larvae (7 dpf) were given 7 identical stimuli (41 dB) that were spaced 20 seconds  
566 apart to prevent habituation.<sup>94</sup> A high-speed video camera (Edgertronic) was set at a 10% pre-  
567 trigger rate to capture 13 frames prior to the stimulus being elicited, while recording larval  
568 movements at 1000 frames per second.

569

### 570 **Measuring startle vibration**

571 Vibration was measured using a 3-axis accelerometer (PCB Piezotronics, model W356B11). The  
572 output signal was first conditioned (PCB Piezotronics, Model 480B31) then passed through a  
573 dual channel analog filter (Model 3382, Krohn-Hite Corporation) using a 10 kHz low-pass cutoff  
574 frequency and 30 dB gain. Finally, the signal was collected by a data acquisition board (National  
575 Instruments Data Acquisition board, Model USB-6251). Raw voltage data were converted into  
576 acceleration units ( $\text{m/s}^2$ ) using manufacturer sensitivity values for each axis of the accelerometer.  
577 The Euclidian norm (vector sum) for the three acceleration signals was calculated to get the total  
578 acceleration. Individual peaks were identified, and metrics were calculated for the time window  
579 between 9 milliseconds prior to the peak to 50 ms after. The maximum value (peak) during each  
580 time window was taken as the zero to peak acceleration value for a given impulse, and this value  
581 was converted to dB using the following equation:

582

$$L_{z-pk} = 20 * \log_{10}(x)$$

583

584 Where  $L_{z-pk}$  is the zero-to-peak acceleration level in dB re  $1 \text{ m/s}^2$ , and  $x$  is the maximum  
585 acceleration level (of the Euclidian norm) over the peak analysis window.

585

## 586 **Startle behavioral analysis**

587 High speed videos were converted into jpegs (.mov files with a minimal resolution of 720x720,  
588 1/1008 shutter speed and a frame rate of 1000 frames/second). To reduce the noise and tracking  
589 errors, the background was subtracted, and the image contrast was enhanced using a custom  
590 script in MATLAB. FLOTE software<sup>95</sup> was then used to analyze the jpegs. Quantitative  
591 attributes of the startle response measured include startle responsiveness (whether larvae  
592 responded or not), latency (delay time prior to startle), maximal bend angle, and maximal  
593 angular velocity during startle. The identities of individual larvae across the multiple stimuli  
594 were distinguished based on their position on a grid.

595

## 596 **Statistical modeling of startle responsiveness**

597 Every fish was given 7 replicate auditory/vibrational stimuli, spaced 20 milliseconds apart. For  
598 all instances where a fish was successfully tracked, response rates were recorded. Percent  
599 response rates for individual fish were calculated (% responsiveness = number of times the fish  
600 responded / number of successfully tracked videos with a maximum of 7 tracks per individual  
601 fish). A mixed effects logistic regression model was used to identify treatment differences in  
602 percent responsiveness, with dose as a fixed effect and the replicate stimuli as a random effect  
603 using the 'glmer' function of lme4 package in R.<sup>96</sup> A Dunnett post-hoc test was used to identify  
604 potential treatment differences in responsiveness (glht(), multcomp R package).<sup>97</sup>

605

## 606 **Identifying SLC versus LLC responses using mixture models**

607 For all the fish that did respond, their startle responses were classified as either short latency c-  
608 bends (SLCs) or long latency c-bends (LLCs) based on an empirically determined latency cut-  
609 off. Latency cut-offs have been known to vary based on environmental conditions such as  
610 temperature.<sup>95</sup> To empirically determine the cut-offs, clustering was done using a Gaussian  
611 mixture model, which fits two Gaussian distributions, and assigns each latency data point a  
612 probability of belonging to either of the two distributions (R package, mixtools).<sup>98</sup> The cut-off  
613 for assigning a response as a SLC was 13 milliseconds – the latency with a greater than 50%  
614 probability of belonging to the first fitted Gaussian distribution (Supplemental Fig. 2). Startle  
615 responses that had latencies greater than 13 milliseconds were classified as LLCs.

616

## 617 **Analysis of treatment differences in startle response kinematics**

618 There were several instances when individual fish performed a combination of LLC and SLC  
619 responses over the 7 replicate stimuli. For fish that did respond, their startle responses were  
620 classified as either SLCs ( $\leq 13$  milliseconds) or LLCs ( $> 13$  milliseconds). Kinematic responses  
621 from the two types of startle responses (SLC v. LLC) were analyzed separately based on  
622 previous research that shows they are driven by different neural circuits and have distinct  
623 kinematic characteristics.<sup>95,99,100</sup> Following this classification, the median response of individual  
624 fish for each startle type was then used to identify treatment-specific differences in kinematics.

625  
626 We first checked for normality and variance homogeneity in the data being analyzed. We used  
627 the Bartlett test to test for homogeneity in variances (`bartlett.test()`, R), and the Shapiro-Wilk's  
628 method to test for normality (`shapiro.test()`, R). Kinematic data (bend angle, maximum angular  
629 velocity) showed departures from normality and had unequal variances. To account for this, we  
630 used nonparametric tests to determine whether fish exposed to various doses of DomA at  
631 different developmental periods had altered bend angles and maximal angular velocities.

632  
633 Kinematic data from fish exposed to DomA at different development days were analyzed  
634 separately. For trials that contained a single dose of DomA, nonparametric Behrens-Fisher t-tests  
635 were used to test the alternative hypothesis that kinematics of fish exposed to DomA were  
636 different from their control counterparts (`npar.t.test()`, `nparcomp` package, R).<sup>101</sup> With trials that  
637 contained multiple doses, nonparametric analyses with Dunnett-type intervals were done to  
638 compare each of the doses to the control (`nparcomp()`, `nonparam` package, R).<sup>101</sup>

639  
640 Functions in the `nparcomp` package estimate the relative effects, which range from 0 to 1. Under  
641 the null hypothesis, the relative effect size is 0.5 – which represents a 50% probability (an equal  
642 probability) that the treated fish has a value greater than the control fish. The closer the estimated  
643 relative effect is to 1, the higher the probability that the measured kinematics in the treated group  
644 has a larger value than the control. In contrast, the closer the estimated relative effect is to 0, the  
645 higher the probability that the measured kinematic parameter in the treated group has a smaller  
646 value than the control.

647

648 **Startle kinematic analysis for interaction effects between dose and day of exposure**

649 We then directly tested whether exposures that occurred on distinct developmental days  
650 influenced startle kinematics differently – in other words, if there is an interaction between dose  
651 and day injected. To examine this, we analyzed the subset of trials that had fish that were  
652 collected from the same breeding cohort at day 0 and then exposed to DomA at different  
653 developmental days (1, 2, or 4 dpf). Aligned Ranked Transformed ANOVA tests were done to  
654 determine whether there was an interaction between dose (0 versus 0.09 ng, or in a separate  
655 analysis, 0 versus 0.13 ng DomA) and day of exposure (1, 2, or 4 dpf) on startle kinematics  
656 (art(), ARTool R package).<sup>102</sup> Difference-of-difference contrasts were then done to determine  
657 whether day of exposure affected treatment differences in kinematics (testContrasts(), Phia R  
658 package).<sup>103</sup> Through this, we addressed questions such as, “is the difference in kinematics  
659 between control fish and those exposed at 2 dpf significant compared to the difference in  
660 kinematics between DomA and control fish when they are exposed at 1 or 4 dpf?”

661  
662 **Fluorescence microscopy**

663 Larvae were anesthetized in tricaine methanesulfonate (MS222) (0.16%), mounted laterally, and  
664 then imaged using either widefield epifluorescence microscopy or confocal microscopy. For  
665 images collected on the confocal microscope, fish were anesthetized and mounted laterally in  
666 1.5% low melt agarose within glass bottom microscopy dishes (Nunc Glass bottom dishes  
667 27mm). ‘Embryo poker’ were used to orient the embryos onto their sides. Once the embryos  
668 were oriented correctly, the agarose was allowed to harden, and the microscopy dish was flooded  
669 with MS222. Fish were then imaged using the confocal microscope (Zeiss LSM-710 and LSM-  
670 780) with the 40x water objective (Zeiss C- Apochromat, NA= 1.1). Images were taken along the  
671 anterior spinal cord in the region around the 5<sup>th</sup> and 10<sup>th</sup> somites.

672  
673 For images collected on the widefield epifluorescence microscope, a subset of fish were laterally  
674 mounted using 1.5% agarose. To allow for more rapid imaging of larvae, most larvae were  
675 oriented into custom-made acrylic molds that contained narrow channels where anesthetized  
676 larvae were positioned laterally using the embryo poker. Fish were imaged using the Zeiss  
677 inverted epifluorescence microscope with either a 20x (Fluar, NA = 0.75) or 10x (Fluar, NA =  
678 0.5) objective. Images were taken along the anterior to medial spinal cord between somites 5-15.



679

680 **Analysis of the prevalence and severity of myelin phenotypes by dose and day of exposure**

681 *Tg(mbp:EGFP-CAAX)* is a stable line in which EGFP is localized to cell membranes including  
682 myelin sheaths. We exposed *Tg(mbp:EGFP-CAAX)* fish to different doses of DomA at select  
683 developmental times and then imaged their spinal cords. Images were classified qualitatively into  
684 categories 0 through 5 based on severity in the myelin defect observed (Supplemental Fig. 4).  
685 Multinomial regression was used to model the effect of both dose and day injected on the  
686 distribution of the myelin severity phenotypes (multinom(), nnet R package).<sup>104</sup>

687

688 The overall significance of the dose and development day of exposures was obtained by  
689 performing an Analysis of Variance (ANOVA) on pairs of multinomial logistic regression  
690 models. The initial multinomial logistic regression model only included the dose of DomA as a  
691 predictor of the distribution of myelin phenotypes:  $\beta_0 + \beta_{\text{dose}}$ . The alternative model incorporated  
692 day of exposure:  $\beta_0 + \beta_{\text{dose}} + \beta_{\text{DayExposure}}$ . An ANOVA test was then used to determine whether the  
693 more complex alternative model was significantly better at capturing the data than the initial  
694 simpler one. A significant ANOVA result would determine whether day of exposure influences  
695 the distribution of the myelin phenotypes (anova(initial model, first alternative model), car  
696 package, R).<sup>105</sup>

697

698 Multinomial models were constructed to identify the effects of increasing doses of DomA on the  
699 distribution of these myelin phenotypes. To accomplish this, we used imaging data from fish  
700 exposed to varying doses of DomA at 2 dpf.

701

702 **Time-lapse microscopy**

703 Embryos were exposed to DomA at 2 dpf, anesthetized, and mounted in 1.5% low melt agarose  
704 at around 2.25 dpf. Images were acquired on the LSM710 using the 20x dry (Plan-Apochromat  
705 20x/0.8) objective. Z-stacks were acquired every 13-17 minutes over the course of 12-13 hours.  
706 For each embryo observed, maximum intensity projections of the z-stacks were then generated  
707 and compiled over time to generate the movie file (ZEN blue, ZEN black imaging software,  
708 Zeiss Microscopy).

709

## 710 **Experimental design for RNASeq**

711 Three individual breeding tanks were set up with two males and one female per tank. Embryos  
712 collected from each tank were split so that some were injected with DomA (0.14 ng) and others  
713 with the saline vehicle control. Embryos were exposed to either the saline vehicle or to 0.14 ng  
714 of DomA at 2 dpf (between 48.5- 51 hpf), then placed into 48-well plates for daily observation.  
715 Pools of 6 embryos from each of the three breeding sets were collected for RNAsequencing (n=3  
716 per treatment) at 3 dpf (76 hpf). The remaining fish were used for imaging myelin at 5 dpf and  
717 for assessing startle behavior at 7 dpf (see below). At the end of the behavioral trial, a subset of  
718 the fish was snap frozen at 7 dpf (124 hpf) for RNA sequencing.

719  
720 To ensure effectiveness of the exposure, a subset of exposed fish were imaged to visualize  
721 myelin structure at 5 dpf and then subjected to behavioral tests (startle response) at 7 dpf.  
722 Consistent with other experimental trials, there were differences in behavior and myelin labeling  
723 between DomA-exposed fish and controls (Supplemental Fig. 5). Fish exposed to DomA at 2 dpf  
724 had shorter bend angles and slower angular velocities relative to controls (Supplemental Fig. 5A  
725 and B). Also consistent with other experimental trials, only DomA-exposed larvae showed any  
726 visible myelin defects, with most of the fish having myelin defects that were in the second to  
727 highest severity (Category 3 = 21/ 49, Supplemental Fig. 5C). Phenotypic analysis thus validated  
728 the use of RNAseq to identify potential transcriptional changes from exposures.

729

## 730 **RNA Isolation and sequencing**

731 RNA was isolated using the Zymo Direct-Zol kit (Catlog # R2062) and quantified using  
732 Nanodrop spectrophotometer. RNA quality was checked using the Bioanalyzer (Agilent  
733 technologies, CA) at the Harvard Biopolymers Facility, Cambridge, MA. RNA integrity number  
734 (RIN) of the samples was 8.2 or higher. Library preparation for single stranded RNAseq was  
735 done using the Illumina TruSeq total RNA library kit. Single-end 50 base pair sequencing was  
736 done on Illumina HiSeq2000 platform. Both library preparation and sequencing was performed  
737 at the Tufts University Core Facility (Boston, MA). Raw data files were assessed for quality  
738 using FastQC.<sup>106</sup> Adapter trimming was done using Trimmomatic.<sup>107</sup> Trimmed reads were  
739 aligned to the genome (GRCz10, version 84) using STAR aligner.<sup>107,108</sup> HTSeq-count was used  
740 to count the number of reads mapped to the annotated regions of the genome.<sup>109</sup> Differential gene

741 expression (DGE) analysis was done using Bioconductor package, edgeR, following the DGE  
742 analysis pipeline outlined by Chen et al 2016.<sup>110,111</sup> Raw and processed data files were deposited  
743 in NCBI Gene Expression Omnibus database (Accession number # GSE140045).

744

745 DGE analysis involved filtering genes with read counts less than  $10/n$ , where  $n$  is the minimal  
746 library size, and then normalizing read counts. Negative binomial models were used to account  
747 for gene-specific variability from biological and technical sources. Multi-dimensional scaling  
748 plots were used to visualize the leading fold-changes (largest 500  $\log_2$  fold changes) between  
749 pairs of samples. False discovery rate of 5% (Benjamini-Hochberg method) was used as a  
750 statistical cutoff for identifying differentially expressed genes. Gene annotation was done using  
751 BioMart with the latest genome (GRCz11), and only annotated genes were used in pathway  
752 analysis. gProfiler was then used to identify enriched Gene Ontology (GO) terms and human  
753 phenology phenotypes.<sup>112</sup> GO terms with evidence only from *in silico* curation methods were  
754 excluded from the enrichment analysis and a statistical significance level of less than or equal to  
755 0.05 (adjusted p-value) was used.

756

## 757 **FUNDING**

758 This research was supported by the Oceans Venture Fund, the Von Damm Fellowship, the Ocean  
759 Ridge Initiative Fellowship, Woods Hole Sea grant (NA14OAR4170074), and the Woods Hole  
760 Center for Oceans and Human Health (NIH: P01ES021923, P01ES021923-04S1, and  
761 P01ES028938; NSF: OCE-1314642 and OCE-1840381).

762

## 763 **ACKNOWLEDGEMENTS**

764 We would like to thank: Hanny E. Rivera and Andrew R. Solow for their advice on the statistical  
765 analysis, Harold Burgess for providing the FLOTE software for startle kinematic analysis, Ian T.  
766 Jones for measuring the vibrational output of the startle set-up, Benjamin G. Merrick for his help  
767 designing and building the startle apparatus, Louis Kerr for microscopy training and advice  
768 (MBL microscopy facility), and the labs who generously provided us with zebrafish transgenic  
769 lines to make this work possible – Bruce Appel (University of Colorado, Denver) and David  
770 Lyons (University of Edinburg).

771

772 **FIGURE LEGENDS**

773 **Figure 1. Experimental set-up**

774 (A) Exposure paradigm and endpoints assessed over zebrafish development.

775 (B) Apparatus used to assess startle responses to A/V stimuli. A speaker with a bonded platform was sent  
776 a 3 millisecond, 1000 Hz pulse, which was then delivered to a 16-well plate. A high-speed camera  
777 captured startle responses at 1000 frames per second.

778 (C) Sample trace of the bend angle over time as a larvae undergoes startle. Bend angle is estimated by  
779 measuring the changes in angles between three line segments that outline the larvae.

780

781 **Figure 2. Domoic acid-exposed larvae at 2 dpf are less responsive to auditory/vibrational stimuli.**

782 Fish exposed to different doses of DomA at 1 dpf (A), 2 dpf (B), and 4 dpf (C). Ratios listed above  
783 represent the number of fish that responded 100% of the time over the total number of fish. Points  
784 represent the percent of times an individual fish that responded to replicate stimuli. Black triangles,  
785 represent the mean responsiveness of fish for each treatment. Asterisks represent statistical significance  
786 between DomA and controls (\*  $p < .05$ , \*\*  $p < .005$ ).

787 Figure supplement: Table 10

788

789 **Figure 3. Exposure to domoic acid at 2 dpf (but not 1 or 4 dpf) consistently alters SLC startle**

790 **response kinematics.** Fish were exposed to different doses of DomA at 1 dpf (A, D), 2 dpf (B, E), and 4  
791 dpf (C, F). SLC startle responses were characterized by bend angle (A-C) and maximal angular velocity  
792 (D-F). Each point represents the median of up to 7 responses for an individual fish. Boxplots show the  
793 group medians, upper 75% quantiles, and lower 25% quantiles. Asterisks represent statistical significance  
794 between DomA and controls (\*  $p < 0.05$ , \*\*  $p < .001$ , \*\*\*  $p < .0001$ ). The numbers shown above each  
795 column represents the number of trials with statistically significant treatment effects / the total number of  
796 trials conducted.

797 Figure supplement: Table 11, Table 13 Table 14, Table 16

798 Table 11, 14 and 16 contains the results from the statistical analysis for 2 dpf, 1 dpf and 4 dpf injected  
799 fish. Table 13 includes medians and interquartile ranges for 2 dpf injected fish.

800

801 **Figure 4. Exposure to domoic acid at 2 dpf (but not 1 or 4 dpf) consistently alters LLC startle**

802 **response kinematics.** Fish were exposed to different doses of DomA at 1 dpf (A, D), 2 dpf (B, E), and 4  
803 dpf (C, F). LLC startle responses were characterized by bend angle (A-C) and maximal angular velocity  
804 (D-F). Each point represents the median of up to 7 responses for an individual fish. Boxplots show the  
805 group medians, upper 75% quantiles, and lower 25% quantiles. Asterisks represent statistical significance

806 between DomA and controls (\*  $p < 0.05$ , \*\*  $p < .001$ , \*\*\*  $p < .0001$ ). The numbers shown above each  
807 column represents the number of trials with statistically significant treatment effects / the total number of  
808 trials conducted.

809 Figure supplement: Table 12, Table 13, Table 15, Table 17

810 Table 12, 15, and 17 contains the results from the statistical analysis for 2 dpf, 1 dpf and 4 dpf injected  
811 fish. Table 13 includes medians and interquartile ranges for 2 dpf injected fish.

812

813 **Figure 5. Exposure to domoic acid at 2 dpf (but not 1 or 4 dpf) alters myelin sheaths at 5 dpf.**

814 (A) *Tg(mbp:EGFP-CAAX)* fish were used to visualize labeled myelin sheaths. (B) Fish were exposed to  
815 DomA (0.13-0.14 ng) during development (1- 4 dpf), then imaged at 5 dpf using confocal microscopy.

816 Arrows indicate the unusual circular membrane profiles. (C) Stacked bar plots show the distribution of  
817 the different myelin phenotypes when fish were exposed to DomA at discrete developmental times.

818 Multiple trials were combined to calculate the % distribution per phenotype observed. (D) Representative  
819 confocal microscopy images of different myelin phenotypes that were observed. Each fish was blindly  
820 classified and assigned a category based on severity of the myelin deficit observed. Scale bar = 100  $\mu\text{m}$ .

821 Figure supplement: Table 18

822 Table 18 includes the number of trials represented along with the associated numbers of fish per trial.

823

824 **Figure 6: Exposure to domoic acid between 2-2.5 dpf alters myelin sheaths at 5 dpf.**

825 (A) *Tg(mbp:EGFP-CAAX)* fish were exposed DomA (0.09-0.18 ng) over a range of discrete  
826 developmental periods (1-4 dpf), then imaged at 5 dpf using widefield epifluorescence microscopy.

827 Images were blindly classified into 6 categories based on severity of the observed myelin phenotype.

828 Arrows indicate the myelinated Mauthner axon that is required for SLC startle responses.

829 (B) Stacked bar plots show the distribution of the different phenotypes. Multiple trials were combined to  
830 calculate the % distribution per phenotype observed. Scale bar = 50  $\mu\text{m}$

831 Figure supplement: Table 19, Table 22, Table 23

832 Table 19 includes the number of trials represented along with the associated numbers of fish per trial.

833 Table 22 contains the output of the multinomial logistic regression model to assess the role of  
834 developmental day of exposure on the distribution of myelin phenotypes.

835 Table 23 contains the output of the multinomial logistic regression model for the influence of dose on the  
836 distribution of myelin phenotypes.

837

838

839 **Figure 7: Myelin sheath labeling defects persist until at least 7 dpf.**

840 *Tg(mbp:EGFP-CAAX)* fish were exposed to DomA over discrete developmental periods (1, 2 and 4 dpf),  
841 then imaged at 6 dpf (A) and 7 dpf (B) using widefield epifluorescence microscopy. Stacked bar plots  
842 show the distribution of the different phenotypes per each dose. Multiple trials were combined to  
843 calculate the % distribution per phenotype observed.

844 Figure supplement: Table 20, Table 21, Table 23

845 Table 20 and 21 contains the number of trials and associated numbers of fish per trial for 6 dpf (Figure  
846 7A) and 7 dpf injected fish (Figure 7B). Table 23 contains the output of the multinomial logistic  
847 regression model for the influence of dose on the distribution of myelin phenotypes.

848

849 **Figure 8: Domoic acid perturbs the initial formation of myelin sheaths.**

850 (A) *Tg(mbp:EGFP-CAAX)* fish were used to visualize labeled myelin sheaths. Larvae exposed to domoic  
851 acid had fewer labeled myelin sheaths compared to controls at the earliest time point myelin sheaths are  
852 detected (3 dpf). Furthermore, DomA-exposed larvae also had aberrant circular protrusions by 3 dpf  
853 (white arrows) (control, n=5 and DomA, n=10). (B) Stills from time-lapse imaging of  
854 *Tg(nkx2.2:mEGFP) x Tg(sox10:mRFP)* from 2.5- 3 dpf. Diagrams above the images show the key  
855 developmental processes in the oligodendrocyte lineage during this time range (control, n=6 and DomA,  
856 n=5). Yellow arrow denotes an elongated myelin sheath, white arrows denote unusual circular myelin  
857 membranes. Scale bar = 100  $\mu$ m

858 Figure supplement: Stills (Fig. 8B) were from a time-lapse of control (Supp. video 2) and DomA exposed  
859 (Supp. video 3) *Tg(nkx2.2:mEGFP) x Tg(sox10:mRFP)* transgenic fish that were imaged from 2.5- 3 dpf.

860

861 **Figure 9: Transcriptional changes associated with domoic acid exposure at 2 dpf.**

862 (A) Experimental design. Tanks of 3 adult fish of (2 females, 1 male) *Tg(mbp:EGFP-CAAX)* background  
863 were bred and exposed to DomA or vehicle at 2 dpf. Pools of 6 embryos within a given treatment from  
864 each tank were then sampled at 3 dpf and 7 dpf for RNAsequencing. For functional analyses, myelin  
865 sheath labeling was assessed at 5 dpf and startle response was assessed at 7 dpf prior to RNAsequencing.

866 (B) MDS plot shows clustering of samples based on overall differences in expression profiles. (C-D)  
867 Mean-difference (MD) plots compare the log fold changes of genes in DomA exposed versus control fish  
868 at the 3 and 7 dpf sampling times.

869 Figure supplement: Table 24, 25, 26, 27

870

871 **Figure 10: Domoic acid exposure at 2 dpf leads to reduced expression of key axonal and myelin**  
872 **structural proteins.**

873 (A) Schematic of the axon-myelin interface with a focus on selected myelin and axon  
874 structural proteins that are differentially expressed in DomA exposed fish.

875 (B) Myelin and structural proteins that are differentially expressed with the log fold change (logFC). (-)  
876 indicates that the gene was down-regulated in DomA-exposed fish relative to controls.

877

## FIGURES

A.

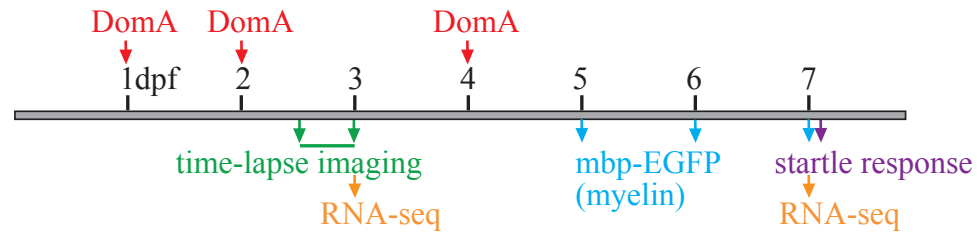

B.

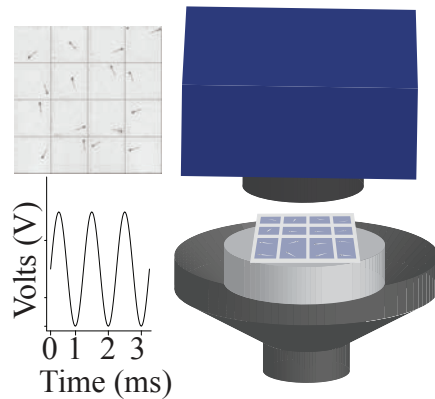

C.

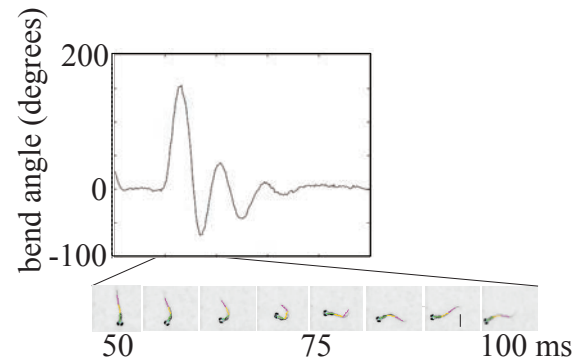

### Figure 1: Experimental setup

(A) Exposure paradigm and endpoints assessed over zebrafish development.

(B) Apparatus used to assess startle responses to A/V stimuli. A speaker with a bonded platform was sent a 3 millisecond, 1000 Hz pulse which was then delivered to a 16-well plate. A high speed camera captured startle responses at 1000 frames per second.

(C) Sample trace of the bend angle over time as a larva undergoes startle. Bend angle is estimated by measuring the changes in angles between three line segments that outline the larva.



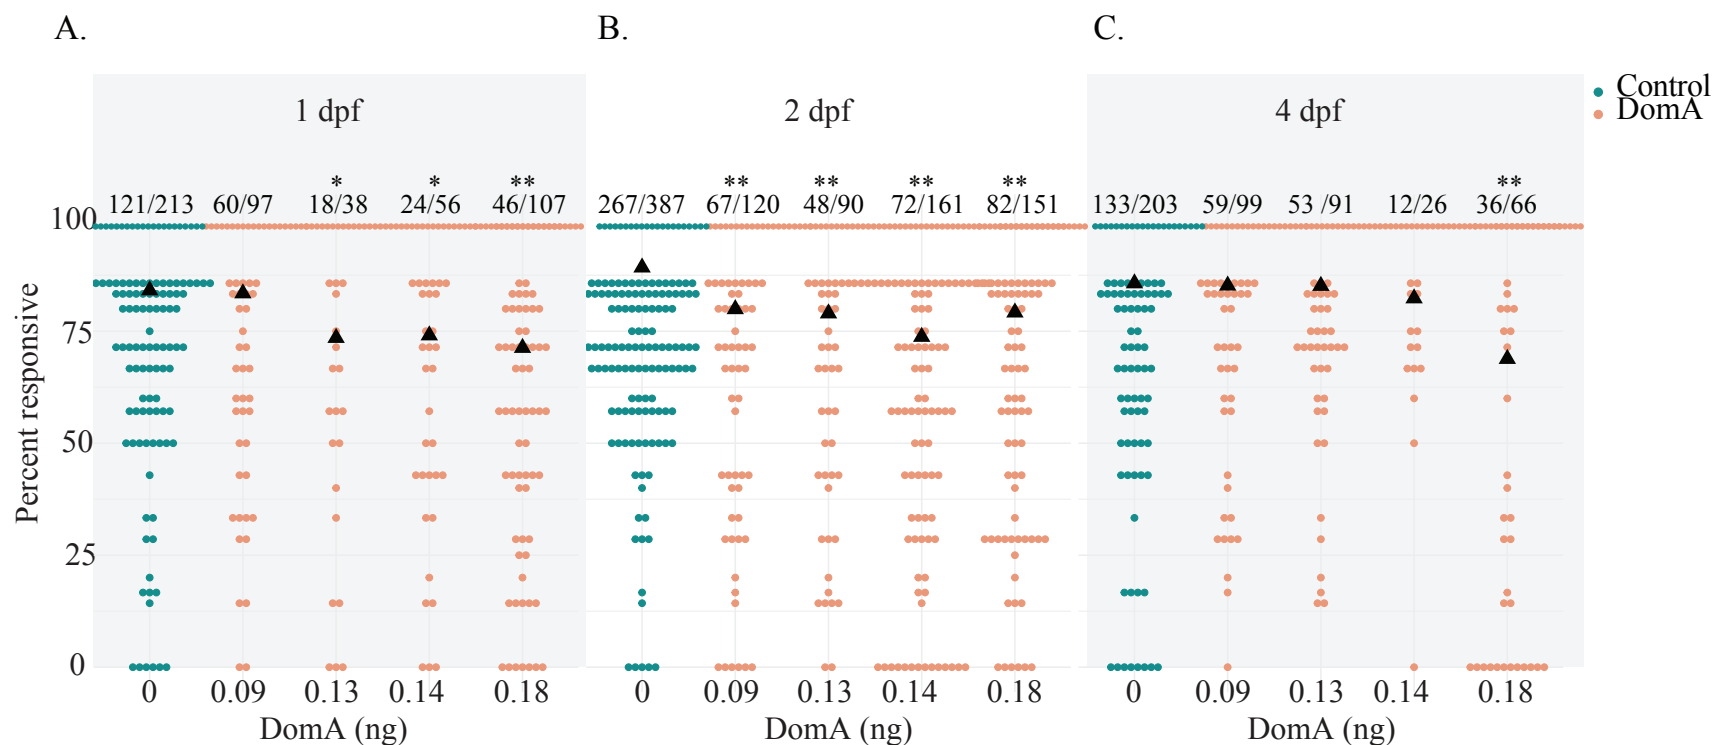

**Figure 2: Domoic acid-exposed larvae at 2 dpf are less responsive to auditory/vibrational stimuli.**  
**(A)** Fish exposed to different doses of DomA at 1 dpf, **(B)** 2 dpf, and **(C)** 4 dpf.  
Ratios listed above represent the number of fish that responded 100% of the time over the total number of fish.  
Points represent the percent of times an individual fish responded to replicate stimuli.  
Black triangles represent the mean responsiveness of fish for each treatment.  
Asterisks represent significant difference between controls and DomA treated larvae (\*=  $p < 0.05$ , \*\*=  $p < 0.005$ )

Figure supplement: Table 10

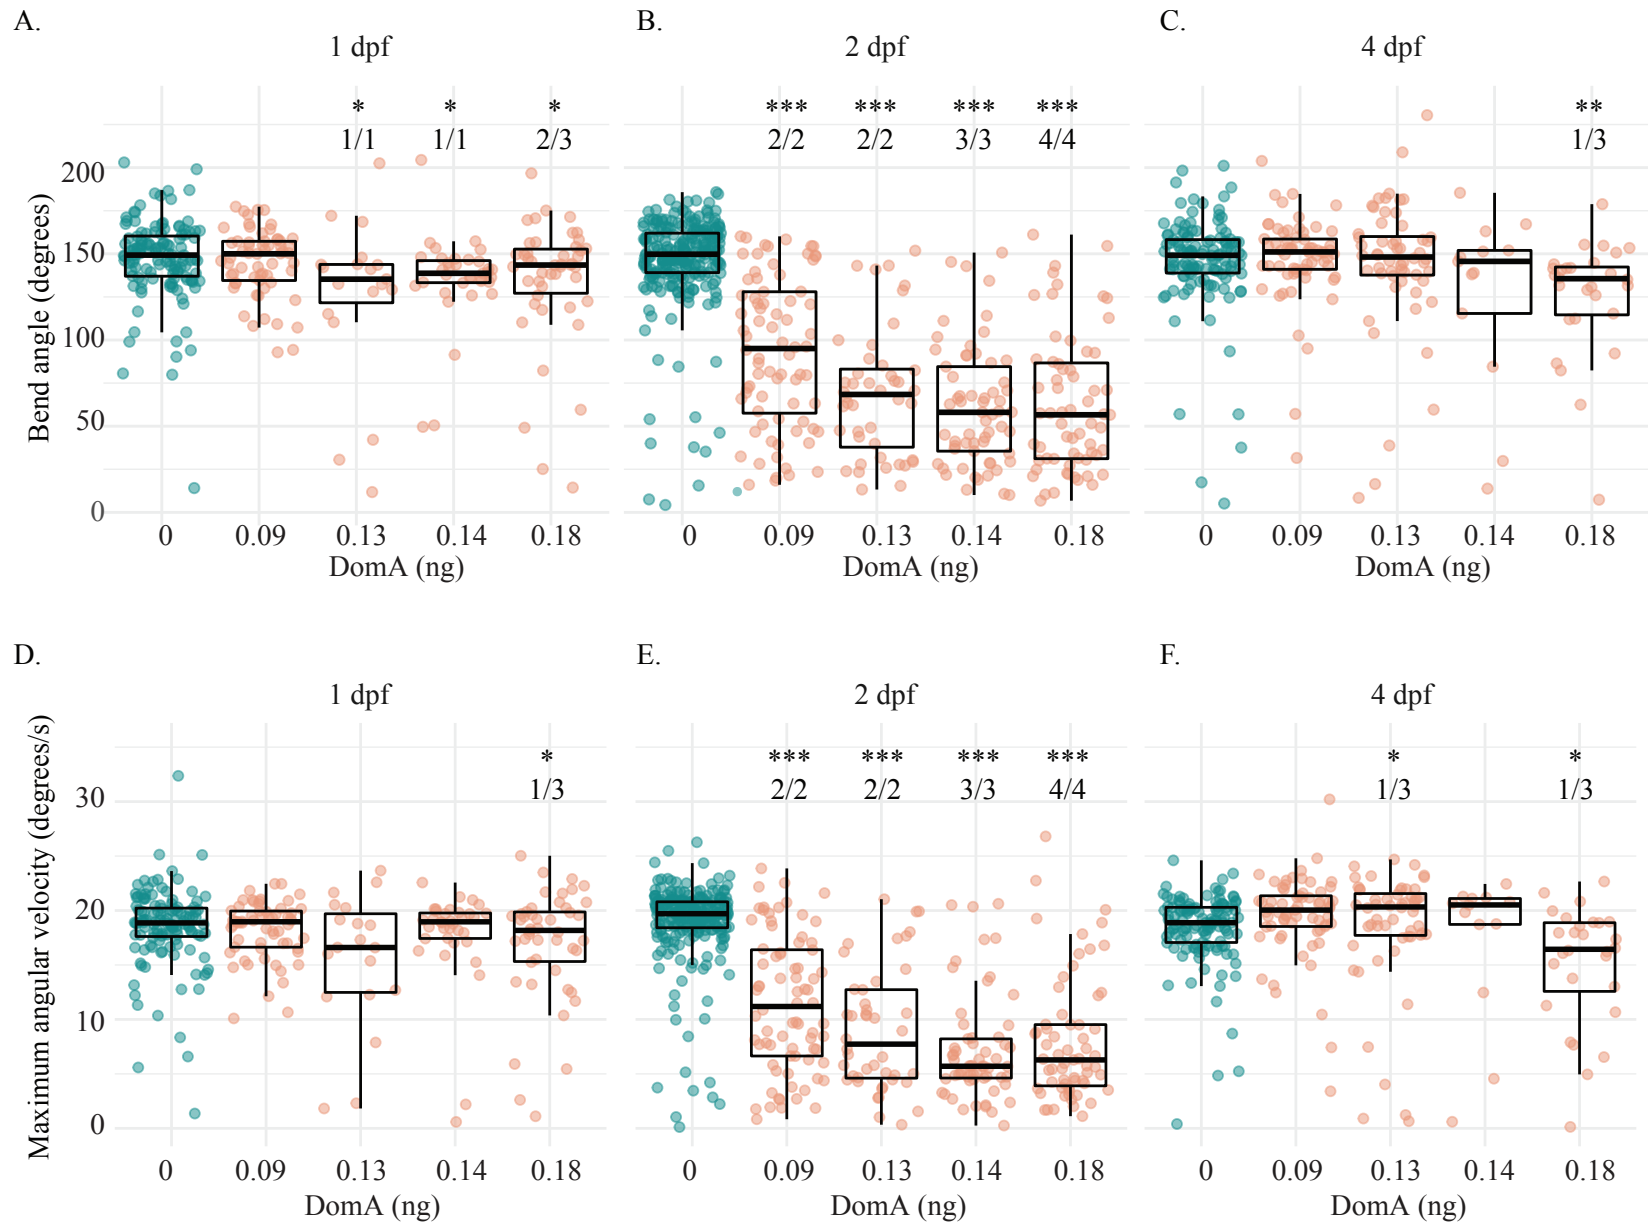

**Figure 3. Exposure to domoic acid at 2 dpf (but not 1 or 4 dpf) consistently alters SLC startle response kinematics.**

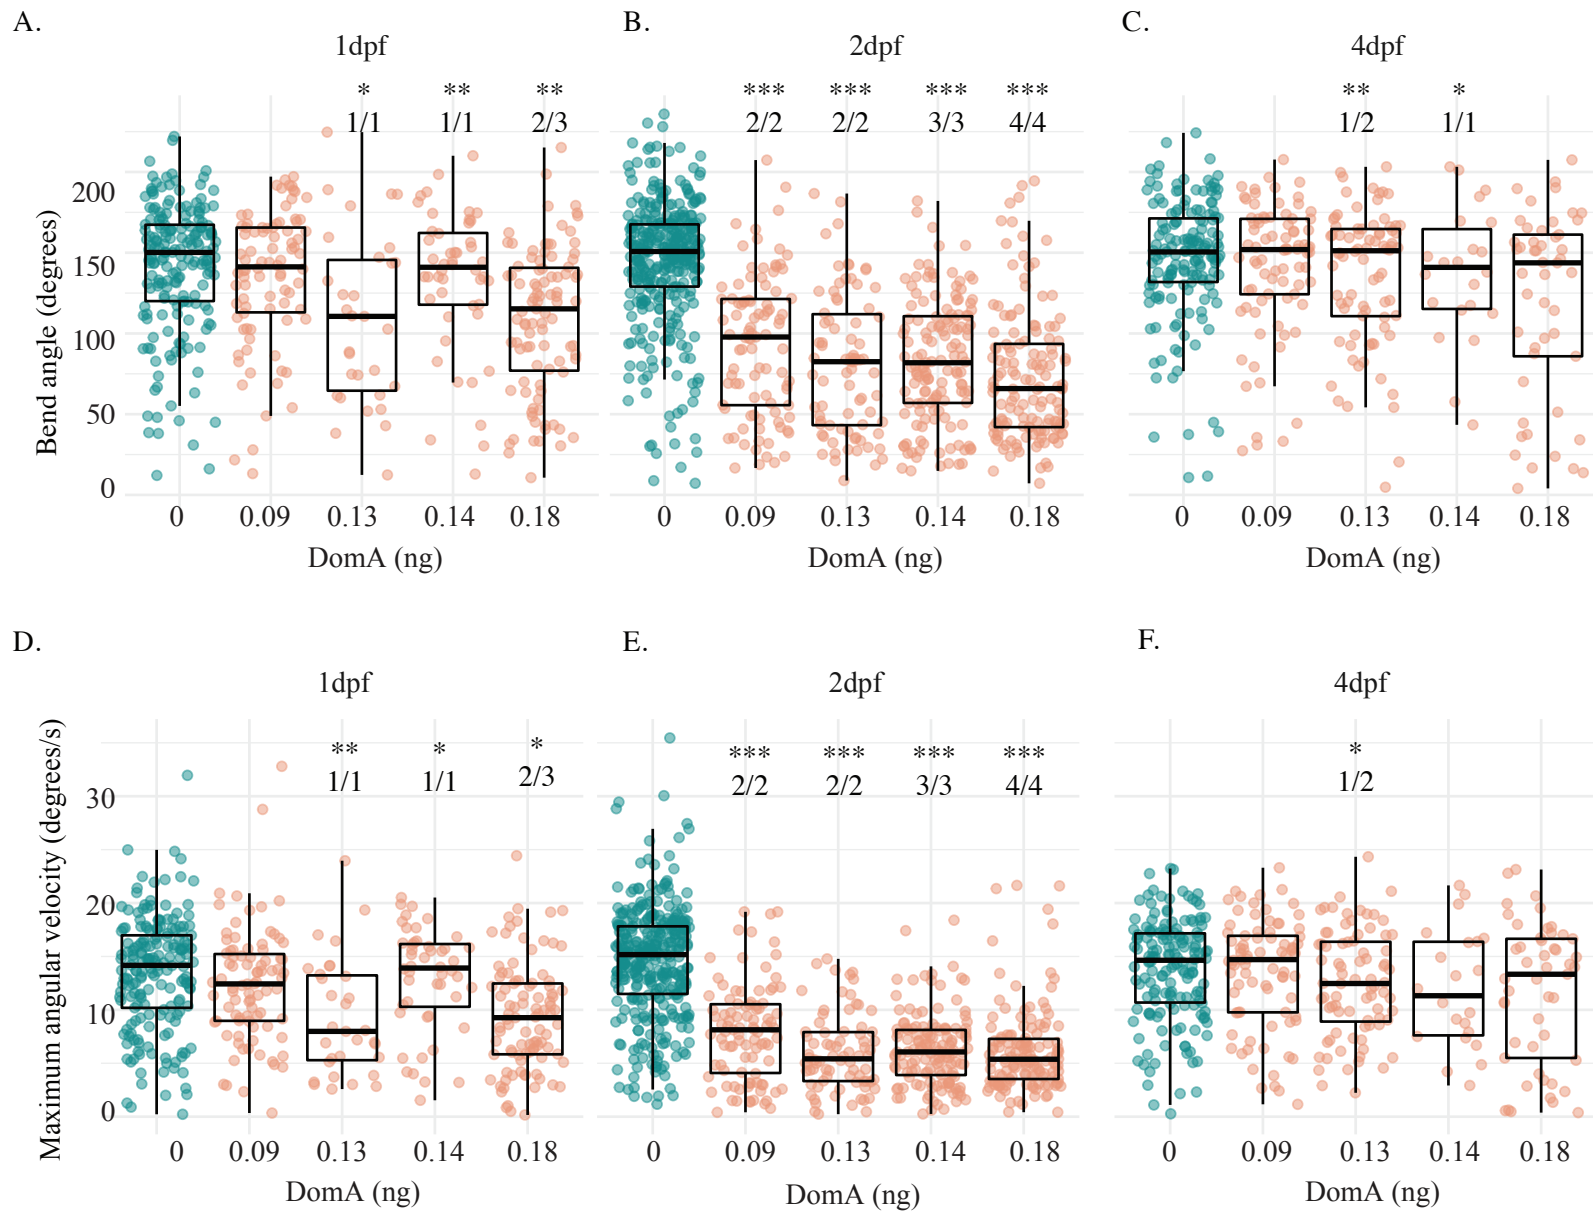

**Figure 4. Exposure to domoic acid at 2 dpf (but not 1 or 4 dpf) consistently alters LLC startle response kinematics.**

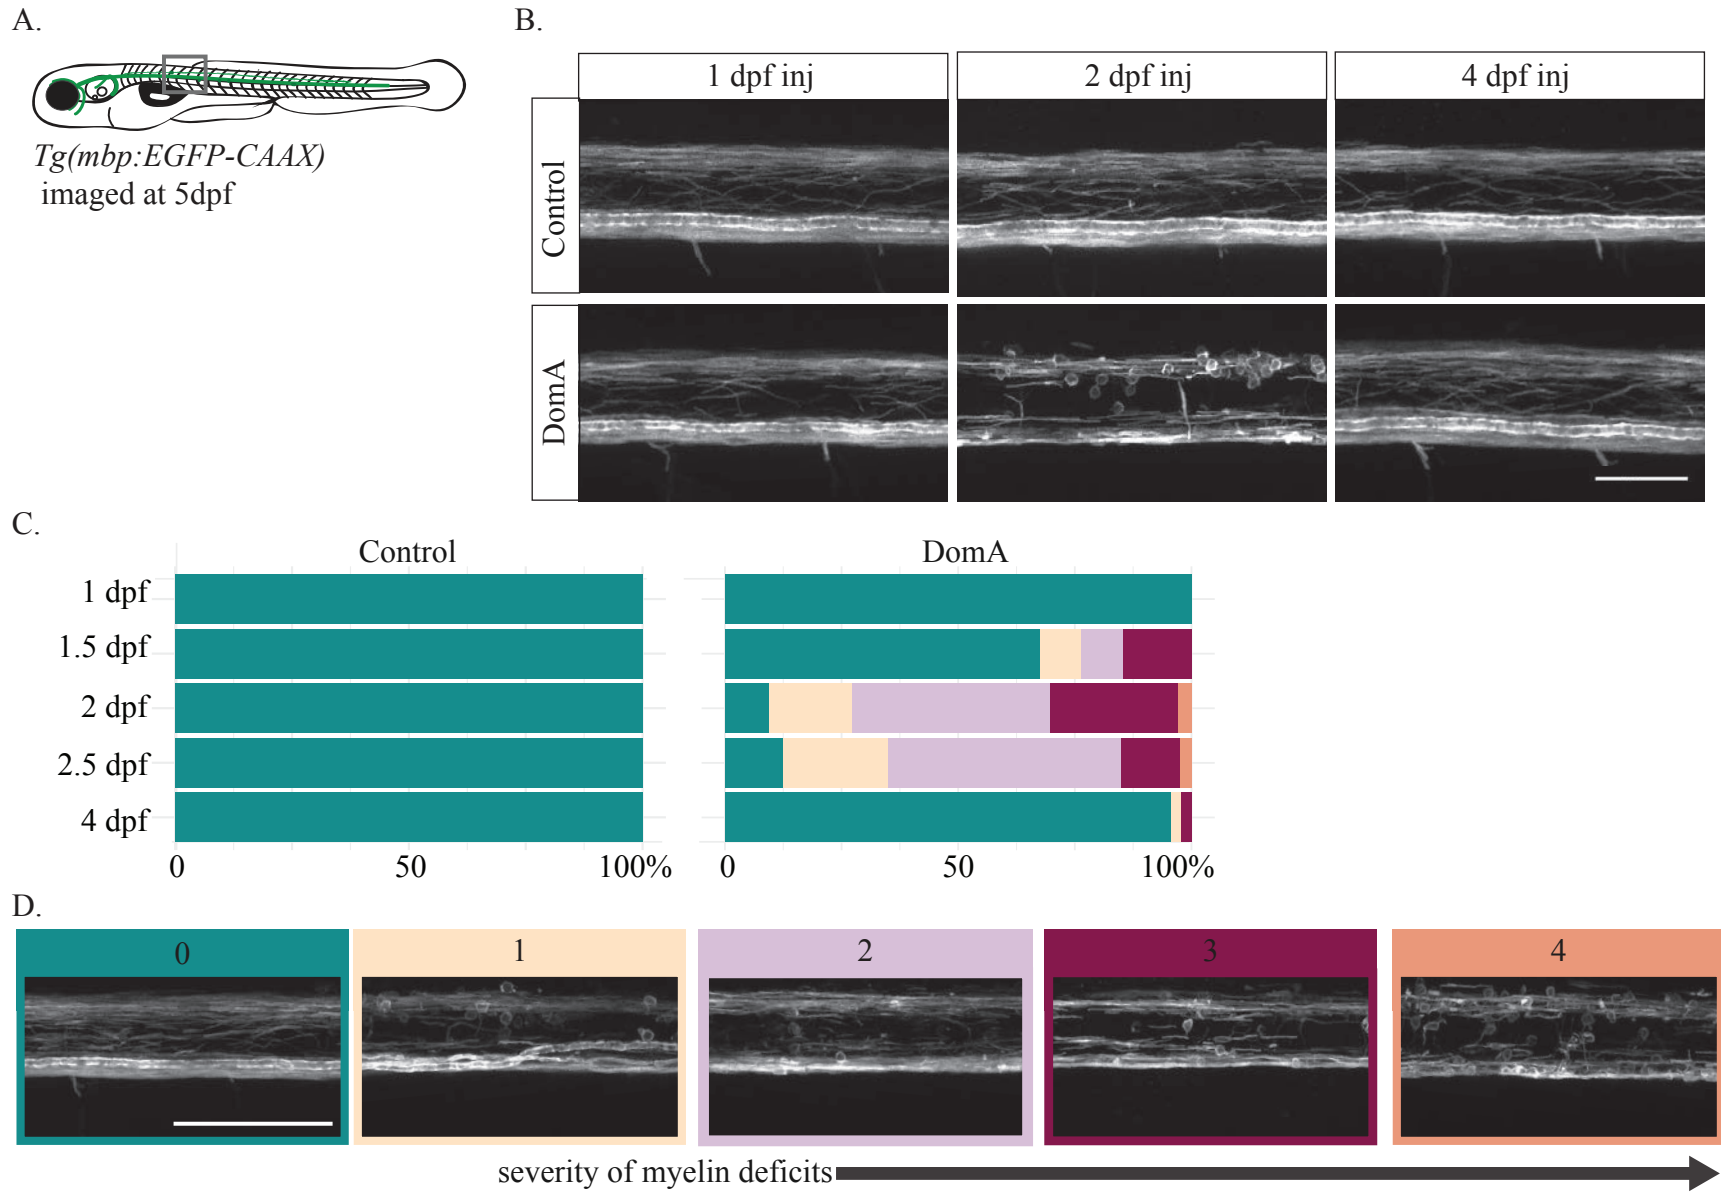

**Figure 5. Exposure to domoic acid at 2 dpf (but not 1 or 4 dpf) alters myelin sheaths at 5 dpf.**

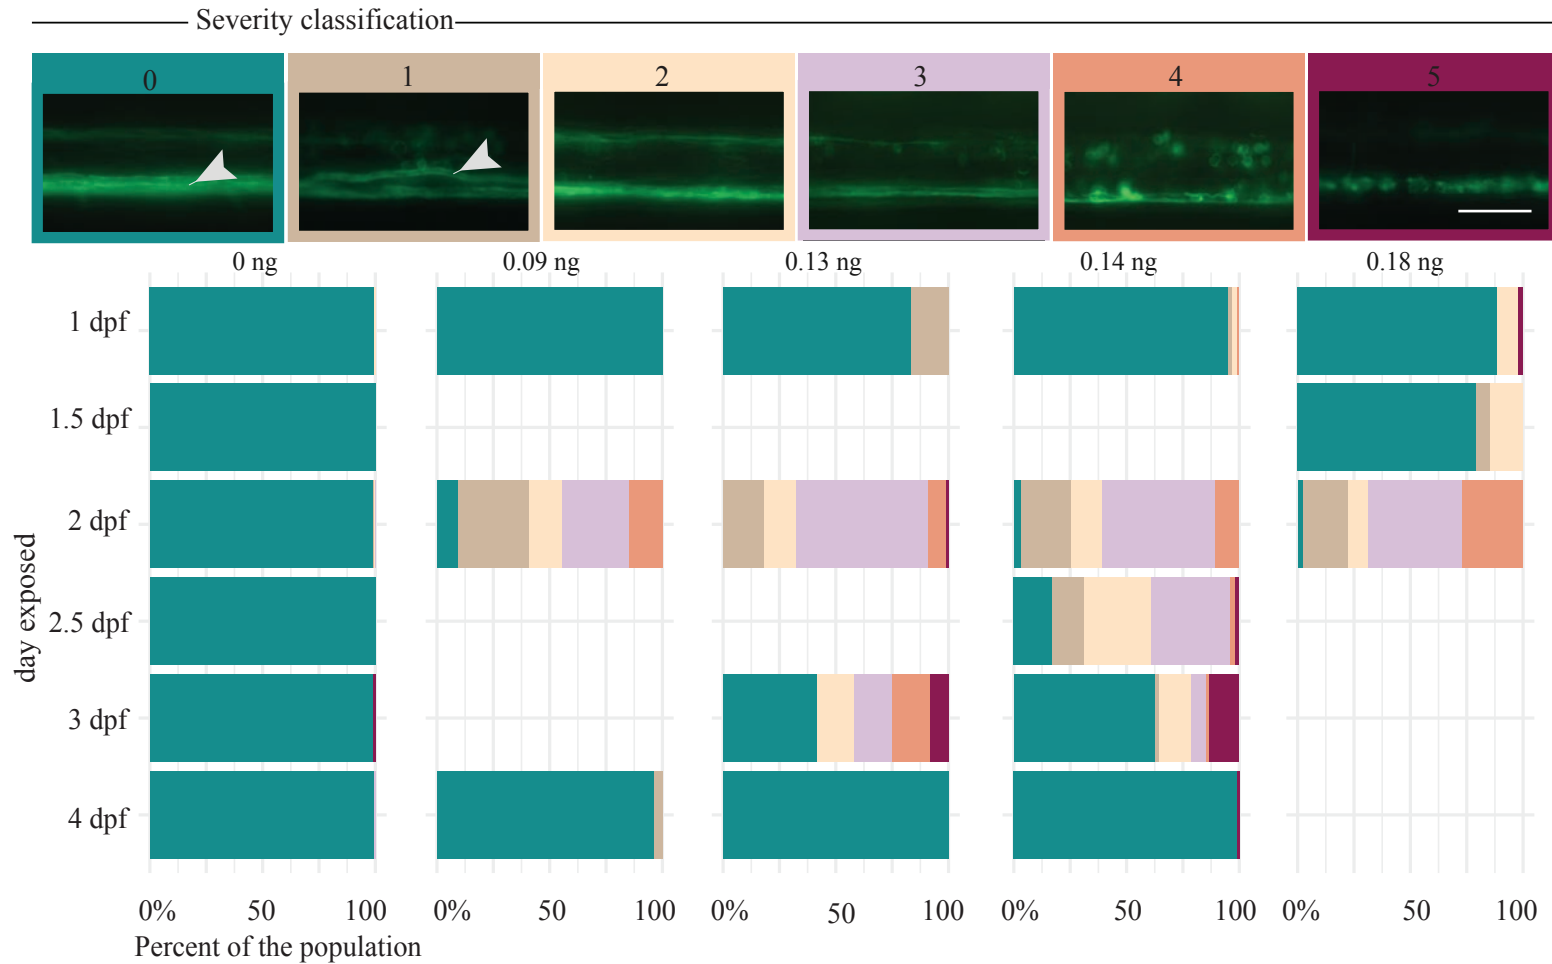

**Figure 6: Exposure to domoic acid between 2-2.5 dpf alters myelin sheaths at 5 dpf.**

(A) *Tg(mbp:EGFP-CAAX)* fish were exposed DomA (0.09-0.18 ng) over a range of discrete developmental periods (1-4 dpf), then imaged at 5 dpf using widefield epifluorescence microscopy. Images were blindly classified into 6 categories based on severity of the observed myelin phenotype. Arrows indicate the myelinated Mauthner axon that is required for SLC startle responses.

(B) Stacked bar plots show the distribution of the different phenotypes. Multiple trials were combined to calculate the % distribution per phenotype observed. Scale bar = 50  $\mu$ m

Figure supplement: Table 19, Table 22, and Table 23

Supplemental Table 19 includes the number of trials represented along with the associated numbers of fish per trial. Supplemental Table 22 contains the output of the multinomial logistic regression model to assess the role of developmental day of exposure on the distribution of myelin phenotypes. Supplemental Table 23 contains the output of the multinomial logistic regression model for the influence of dose on the distribution of myelin phenotypes.

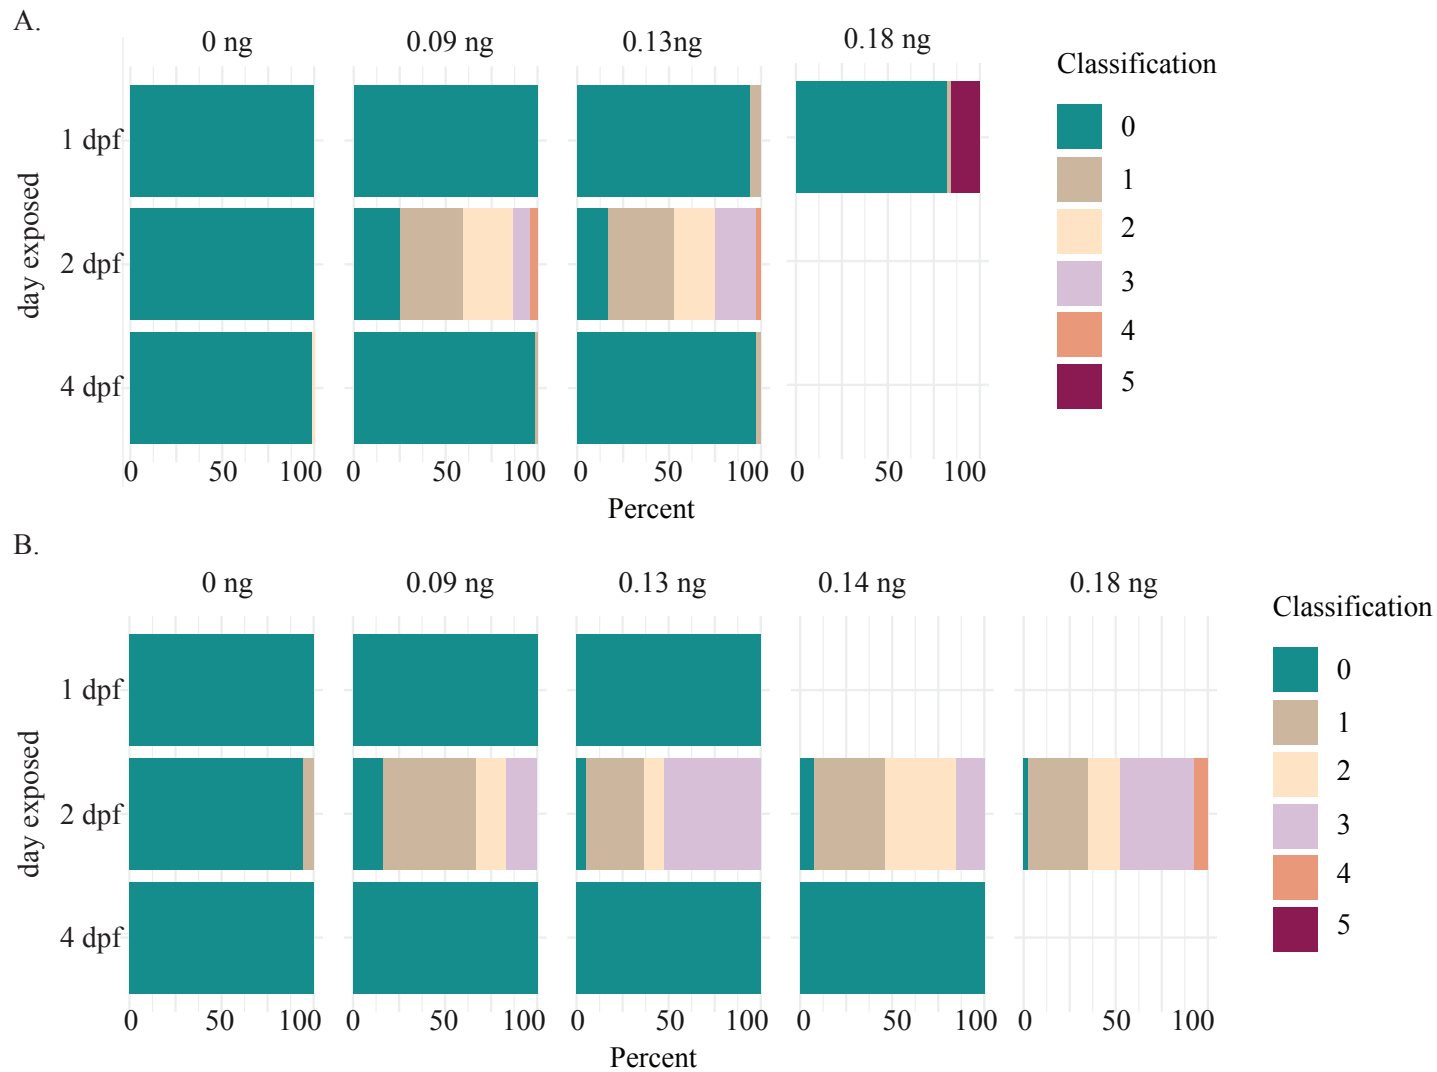

**Figure 7: Myelin sheath labeling defects persist until at least 7 dpf.**

*Tg(mbp:EGFP-CAAX)* fish were exposed to DomA over discrete developmental periods (1, 2 and 4 dpf), then imaged at 6 dpf (A) and 7 dpf (B) using widefield epifluorescence microscopy. Stacked bar plots show the distribution of the different phenotypes per each dose. Multiple trials were combined to calculate the % distribution per phenotype observed.

Figure supplement: Table 20, Table 21, Table 23

Table 20 and 21 contains the number of trials and associated numbers of fish per trial for 6 dpf (Fig. 7A) and 7 dpf injected fish (Fig. 7B).

Table 23 contains the output of the multinomial logistic regression model for the influence of dose on the distribution of myelin phenotypes.

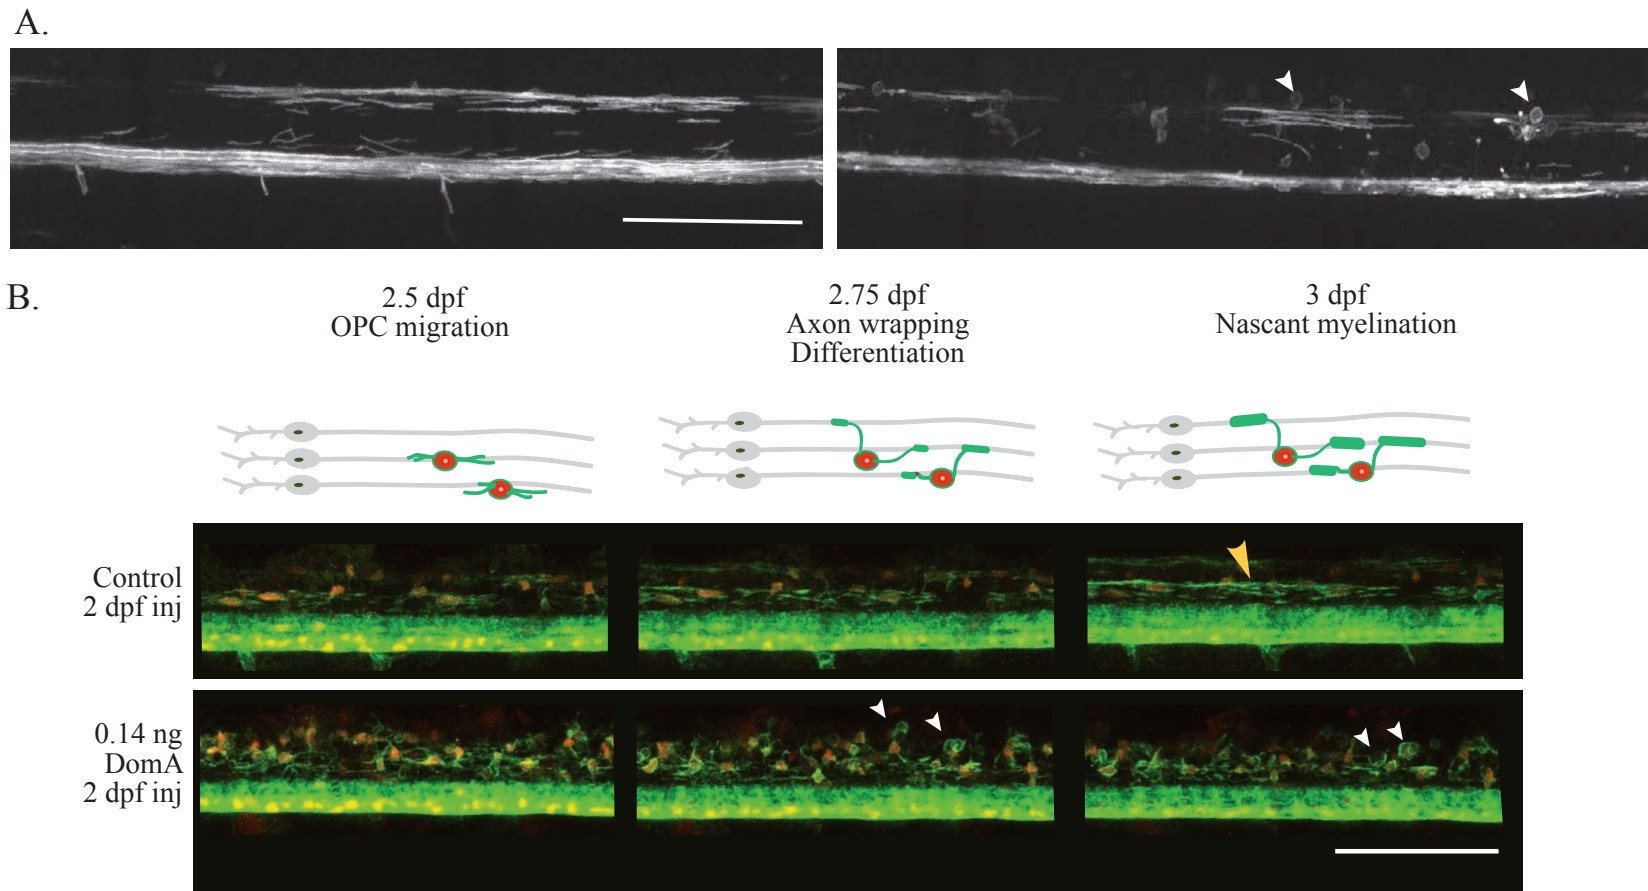

**Figure 8: Domoic acid perturbs the initial formation of myelin sheaths.**

(A) *Tg(mbp:EGFP-CAAX)* was used to visualize labeled myelin sheaths. Larvae exposed to domoic acid had fewer labeled myelin sheaths compared to controls at the earliest time point myelin sheaths are detected (3 dpf). Furthermore, DomA-exposed larvae also had aberrant circular myelin membranes by 3 dpf (white arrows).

(B) Stills from time-lapse imaging of *Tg(nkx2.2a:mEGFP)* x *Tg(sox10:mRFP)* from 2.5- 3 dpf. Diagrams above the images show the key developmental processes in the oligodendrocyte lineage during this time period (control, n=5 and DomA, n=6). Yellow arrow denotes an elongated myelin sheath. White arrows denote unusual circular myelin membranes. Scale bar = 100  $\mu$ m.

Figure supplement: Stills (Fig. 8B) were from a time-lapse of control (Supp. video 2) and DomA exposed (Supp. video 3) *Tg(nkx2.2:mEGFP)* x *Tg(sox10:mRFP)* transgenic fish that were imaged from 2.5- 3 dpf.

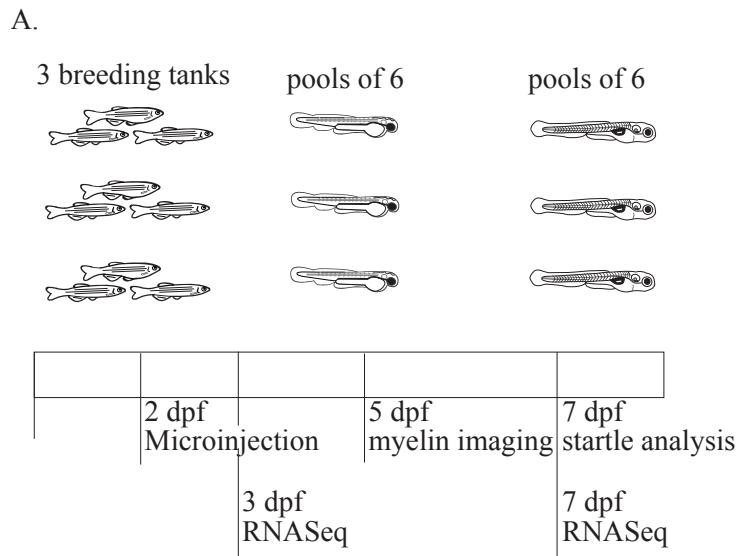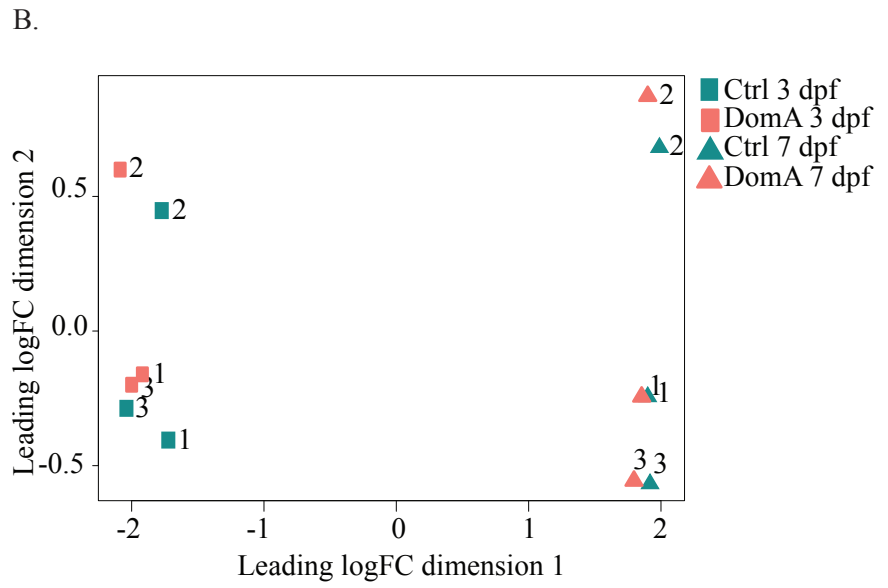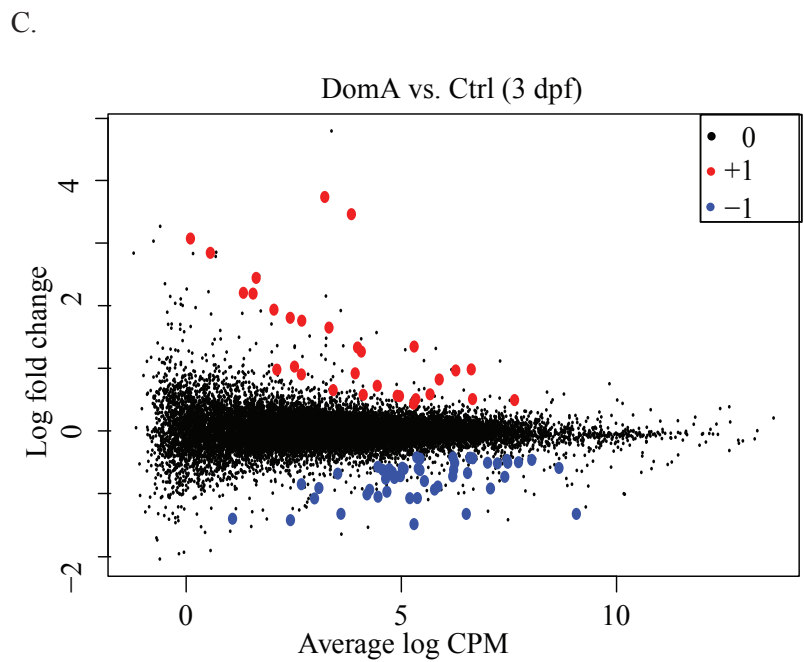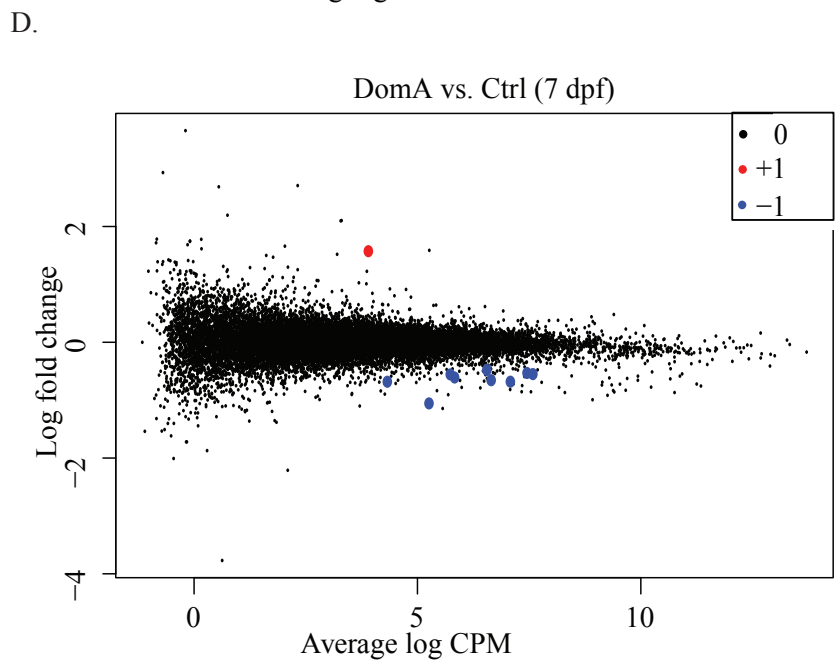

Figure 9: Transcriptional changes associated with domoic acid exposure at 2 dpf.



A.

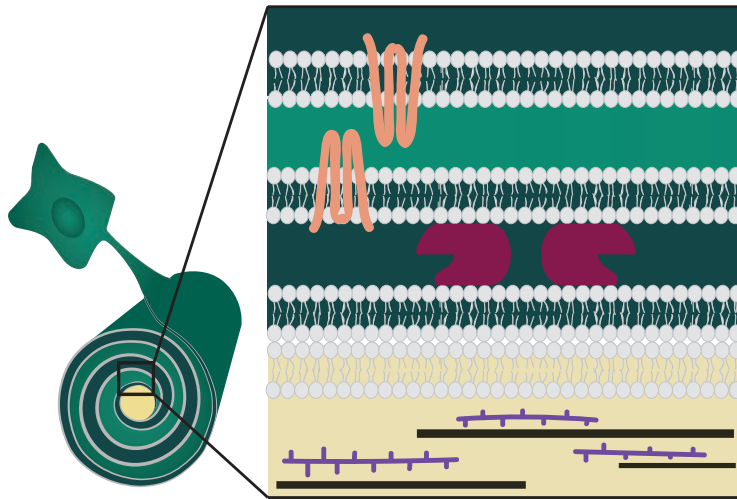

B.

Myelin structural proteins

| gene name   | logFC |
|-------------|-------|
| <i>mpz</i>  | -0.75 |
| <i>mbpa</i> | -0.51 |

Axonal structural proteins

| gene name    | logFC |
|--------------|-------|
| <i>nefla</i> | -1.33 |
| <i>neflb</i> | -0.94 |
| <i>nefma</i> | -0.80 |
| <i>nefmb</i> | -1.08 |

**Figure 10: Domoic acid exposure at 2 dpf leads to reduced expression of key axonal and myelin structural proteins by 3 dpf.**

(A) Schematic of the axon-myelin interface with a focus on selected myelin and axon structural proteins that are differentially expressed in DomA exposed fish.

(B) Myelin and structural proteins that are differentially expressed with the log fold change (logFC). (-) indicates that the gene was downregulated in DomA-exposed fish relative to controls.

878 **REFERENCES**

879

- 880 1. Hampson DR, Huang X, Wells JW, Walter JA, Wright JLC. Interaction of domoic acid  
881 and several derivatives with kainic acid and AMPA binding sites in rat brain. *Eur J*  
882 *Pharmacol.* 1992;218(1):1-8. doi:10.1016/0014-2999(92)90140-Y
- 883 2. Lefebvre KA, Robertson A. Domoic acid and human exposure risks: a review. *Toxicon.*  
884 2010;56(2):218-230. doi:10.1016/j.toxicon.2009.05.034
- 885 3. Perl TM, Bédard L, Kosatsky T, Hockin JC, Todd EC, Remis RS. An outbreak of toxic  
886 encephalopathy caused by eating mussels contaminated with domoic acid. *N Engl J Med.*  
887 1990;322(25):1775-1780. doi:10.1056/NEJM199006213222504
- 888 4. Jeffery B, Barlow T, Moizer K, Paul S, Boyle C. Amnesic shellfish poison. *Food Chem*  
889 *Toxicol.* 2004;42(4):545-557. doi:10.1016/j.fct.2003.11.010
- 890 5. Wekell JC, Jurst J, Lefebvre KA. The origin of the regulatory limits for PSP and ASP  
891 toxins in shellfish. *J Shellfish Res.* 2010;23(July):927-930.
- 892 6. Mariën K. Establishing tolerable dungeness crab (*Cancer magister*) and razor clam  
893 (*Siliqua patula*) domoic acid contaminant levels. *Environ Health Perspect.*  
894 1996;104(11):1230-1236. doi:10.1289/ehp.104-1469507
- 895 7. Grandjean P, Landrigan PJ. Neurobehavioural effects of developmental toxicity. *Lancet*  
896 *Neurol.* 2014;13(3):330-338. doi:10.1016/S1474-4422(13)70278-3
- 897 8. Andersen HR, Nielsen JB, Grandjean P. Toxicologic evidence of developmental  
898 neurotoxicity of environmental chemicals. *Toxicology.* 2000;144(1-3):121-127.  
899 doi:10.1016/S0300-483X(99)00198-5
- 900 9. Costa LG, Giordano G, Faustman EM. Domoic acid as a developmental neurotoxin.  
901 *Neurotoxicology.* 2010;31(5):409-423. doi:10.1016/j.neuro.2010.05.003
- 902 10. Tryphonas L, Truelove J, Nera E, Iverson F. Acute Neurotoxicity of Domoic Acid in the  
903 Rat. *Toxicol Pathol.* 1990;18(1):1-9. doi:10.1177/019262339001800101
- 904 11. Doucette TA, Bernard PB, Husum H, Perry MA, Ryan CL, Tasker RA. Low doses of  
905 domoic acid during postnatal development produce permanent changes in rat behaviour  
906 and hippocampal morphology. *Neurotox Res.* 2004;6(7-8):555-563.  
907 doi:10.1007/BF03033451
- 908 12. Xi D, Peng YG, Ramsdell JS. Domoic acid is a potent neurotoxin to neonatal rats. *Nat*  
909 *Toxins.* 1997;5(2):74-79. doi:10.1002/(SICI)(1997)5:2<74::AID-NT4>3.0.CO;2-I
- 910 13. Maucher JM, Ramsdell JS. Maternal-fetal transfer of domoic acid in rats at two  
911 gestational time points. *Environ Health Perspect.* 2007;115(12):1743-1746.  
912 doi:10.1289/ehp.10446
- 913 14. Ahrens MB, Li JM, Orger MB, et al. Brain-wide neuronal dynamics during motor  
914 adaptation in zebrafish. *Nature.* 2012;485(7399):471-477. doi:10.1038/nature11057
- 915 15. Scholin CA, Gulland F, Doucette GJ, et al. Mortality of sea lions along the central  
916 California coast linked to a toxic diatom bloom. *Nature.* 2000;403(6765):80-84.  
917 doi:10.1038/47481
- 918 16. Brodie Frances M D Gulland Denise J Greig EC, Hunter M, Jaakola J, Leger JS,  
919 Leighfield Frances M Van Dolah TA. Domoic acid causes reproductive failure in  
920 california sea lions (*Zalophus Californianus*). *Mar Mammal Sci.* 22AD;3(700-707).  
921 doi:10.1111/j.1748-7692.2006.00045.x
- 922 17. Lefebvre KA, Hendrix A, Halaska B, et al. Domoic acid in California sea lion fetal fluids  
923 indicates continuous exposure to a neuroteratogen poses risks to mammals. *Harmful*

- 924 *Algae*. July 2018. doi:10.1016/J.HAL.2018.06.003
- 925 18. Rust L, Gulland F, Frame E, Lefebvre K. Domoic acid in milk of free living California  
926 marine mammals indicates lactational exposure occurs. *Mar Mammal Sci*.  
927 2014;30(3):1272-1278. doi:10.1111/mms.12117
- 928 19. Maucher JM, Ramsdell JS. Domoic acid transfer to milk: evaluation of a potential route of  
929 neonatal exposure. *Environ Health Perspect*. 2005;113(4):461-464. doi:10.1289/ehp.7649
- 930 20. Tanemura K, Igarashi K, Matsugami T-R, Aisaki K, Kitajima S, Kanno J. Intrauterine  
931 environment-genome interaction and Children's development (2): Brain structure  
932 impairment and behavioral disturbance induced in male mice offspring by a single  
933 intraperitoneal administration of domoic acid (DA) to their dams. *J Toxicol Sci*.  
934 2009;34:SP279-SP286. doi:10.2131/jts.34.SP279
- 935 21. Shiotani M, Cole TB, Hong S, et al. Neurobehavioral assessment of mice following  
936 repeated oral exposures to domoic acid during prenatal development. *Neurotoxicol*  
937 *Teratol*. 2017;64:8-19. doi:10.1016/J.NTT.2017.09.002
- 938 22. Levin ED, Pizarro K, Pang WG, Harrison J, Ramsdell JS. Persisting behavioral  
939 consequences of prenatal domoic acid exposure in rats. *Neurotoxicol Teratol*. 27(5):719-  
940 725. doi:10.1016/j.ntt.2005.06.017
- 941 23. Perry MA, Ryan CL, Tasker RA. Effects of low dose neonatal domoic acid administration  
942 on behavioural and physiological response to mild stress in adult rats. *Physiol Behav*.  
943 2009;98(1-2):53-59. doi:10.1016/J.PHYSBEH.2009.04.009
- 944 24. Burt MA, Ryan CL, Doucette TA. Altered responses to novelty and drug reinforcement in  
945 adult rats treated neonatally with domoic acid. *Physiol Behav*. 2008;93(1-2):327-336.  
946 doi:10.1016/j.physbeh.2007.09.003
- 947 25. Burt MA, Ryan CL, Doucette TA. Low dose domoic acid in neonatal rats abolishes  
948 nicotine induced conditioned place preference during late adolescence. *Amino Acids*.  
949 2008;35(1):247-249. doi:10.1007/s00726-007-0584-2
- 950 26. Howe K, Clark MD, Torroja CF, et al. The zebrafish reference genome sequence and its  
951 relationship to the human genome. *Nature*. 2013;496(7446):498-503.  
952 doi:10.1038/nature12111
- 953 27. Tropepe V, Sive HL. Can zebrafish be used as a model to study the neurodevelopmental  
954 causes of autism? *Genes Brain Behav*. 2003;2(5):268-281.  
955 <http://www.ncbi.nlm.nih.gov/pubmed/14606692>. Accessed May 21, 2015.
- 956 28. Sumbre G, de Polavieja GG. The world according to zebrafish: how neural circuits  
957 generate behavior. *Front Neural Circuits*. 2014;8:91. doi:10.3389/fncir.2014.00091
- 958 29. Higashijima S, Masino MA, Mandel G, Fetcho JR. Imaging neuronal activity during  
959 zebrafish behavior with a genetically encoded calcium indicator. *J Neurophysiol*.  
960 2003;90(6):3986-3997. doi:10.1152/jn.00576.2003
- 961 30. Fetcho JR, Higashijima S-I. Optical and genetic approaches toward understanding  
962 neuronal circuits in zebrafish. *Integr Comp Biol*. 2004;44(1):57-70.  
963 doi:10.1093/icb/44.1.57
- 964 31. Guo S. Linking genes to brain, behavior and neurological diseases: what can we learn  
965 from zebrafish? *Genes, Brain Behav*. 2004;3(2):63-74. doi:10.1046/j.1601-  
966 183X.2003.00053.x
- 967 32. Arrenberg AB, Driever W. Integrating anatomy and function for zebrafish circuit analysis.  
968 *Front Neural Circuits*. 2013;7:74. doi:10.3389/fncir.2013.00074
- 969 33. Eddins D, Cerutti D, Williams P, Linney E, Levin ED. Zebrafish provide a sensitive

- 970 model of persisting neurobehavioral effects of developmental chlorpyrifos exposure:  
971 comparison with nicotine and pilocarpine effects and relationship to dopamine deficits.  
972 *Neurotoxicol Teratol.* 2010;32(1):99-108. doi:10.1016/j.ntt.2009.02.005
- 973 34. Pogoda H-M, Sternheim N, Lyons DA, et al. A genetic screen identifies genes essential  
974 for development of myelinated axons in zebrafish. *Dev Biol.* 2006;298(1):118-131.  
975 doi:10.1016/j.ydbio.2006.06.021
- 976 35. Almeida RG, Czopka T, Ffrench-Constant C, Lyons DA. Individual axons regulate the  
977 myelinating potential of single oligodendrocytes in vivo. *Development.*  
978 2011;138(20):4443-4450. doi:10.1242/dev.071001
- 979 36. Tiedeken JA, Ramsdell JS, Ramsdell AF. Developmental toxicity of domoic acid in  
980 zebrafish (*Danio rerio*). *Neurotoxicol Teratol.* 2005;27:711-717.
- 981 37. Tiedeken JA, Ramsdell JS. Embryonic exposure to domoic Acid increases the  
982 susceptibility of zebrafish larvae to the chemical convulsant pentylenetetrazole. *Environ*  
983 *Health Perspect.* 2007;115(11):1547-1552. doi:10.1289/ehp.10344
- 984 38. Kirby BB, Takada N, Latimer AJ, et al. In vivo time-lapse imaging shows dynamic  
985 oligodendrocyte progenitor behavior during zebrafish development. *Nat Neurosci.*  
986 2006;9(12):1506-1511. doi:10.1038/nm1803
- 987 39. Brösamle C, Halpern ME. Characterization of myelination in the developing zebrafish.  
988 *Glia.* 2002;39(1):47-57. doi:10.1002/glia.10088
- 989 40. Kolodziejczyk K, Saab AS, Nave K-A, Attwell D. Why do oligodendrocyte lineage cells  
990 express glutamate receptors? *F1000 Biol Rep.* 2010;2:57. doi:10.3410/B2-57
- 991 41. Patneau DK, Wright PW, Winters C, Mayer ML, Gallo V. Glial cells of the  
992 oligodendrocyte lineage express both kainate- and AMPA-preferring subtypes of  
993 glutamate receptor. *Neuron.* 1994;12(2):357-371. doi:10.1016/0896-6273(94)90277-1
- 994 42. Alberdi E, Sánchez-Gómez MV, Marino A, Matute C. Ca<sup>2+</sup> influx through AMPA or  
995 kainate receptors alone is sufficient to initiate excitotoxicity in cultured oligodendrocytes.  
996 *Neurobiol Dis.* 2002;9(2):234-243. doi:10.1006/nbdi.2001.0457
- 997 43. Matute C, Domercq M, Sánchez-Gómez M-V. Glutamate-mediated glial injury:  
998 mechanisms and clinical importance. *Glia.* 2006;53(2):212-224. doi:10.1002/glia.20275
- 999 44. Rosenberg PA, Dai W, Gan XD, et al. Mature myelin basic protein-expressing  
1000 oligodendrocytes are insensitive to kainate toxicity. *J Neurosci Res.* 2003;71(2):237-245.  
1001 doi:10.1002/jnr.10472
- 1002 45. Deng W, Rosenberg P a, Volpe JJ, Jensen FE. Calcium-permeable AMPA/kainate  
1003 receptors mediate toxicity and preconditioning by oxygen-glucose deprivation in  
1004 oligodendrocyte precursors. *Proc Natl Acad Sci U S A.* 2003;100(11):6801-6806.  
1005 doi:10.1073/pnas.1136624100
- 1006 46. Gallo V, Zhou J, McBain C, Wright P, Knutson P, Armstrong R. Oligodendrocyte  
1007 progenitor cell proliferation and lineage progression are regulated by glutamate receptor-  
1008 mediated K<sup>+</sup> channel block. *J Neurosci.* 1996;16(8):2659-2670.  
1009 <http://www.jneurosci.org/content/16/8/2659.short>. Accessed December 7, 2014.
- 1010 47. Gudz TI, Komuro H, Macklin WB. Glutamate stimulates oligodendrocyte progenitor  
1011 migration mediated via an alphav integrin/myelin proteolipid protein complex. *J Neurosci.*  
1012 2006;26(9):2458-2466. doi:10.1523/JNEUROSCI.4054-05.2006
- 1013 48. Matute C. Characteristics of acute and chronic kainate excitotoxic damage to the optic  
1014 nerve. *Proc Natl Acad Sci U S A.* 1998;95(17):10229-10234. doi:pnas.95.17.10229
- 1015 49. Verity AN, Campagnoni AT. *Myelination and Its Underlying Mechanisms Regional*

- 1016 *Expression of Myelin Protein Genes in the Developing Mouse Brain: In Situ Hybridization*  
1017 *Studies*. Vol 21.; 1988. <https://onlinelibrary.wiley.com/doi/pdf/10.1002/jnr.490210216>.  
1018 Accessed February 8, 2019.
- 1019 50. Foran DR, Peterson AC. Myelin acquisition in the central nervous system of the mouse  
1020 revealed by an MBP-Lac Z transgene. *J Neurosci*. 1992;12(12):4890-4897.  
1021 doi:10.1523/JNEUROSCI.12-12-04890.1992
- 1022 51. Eliceiri BP, Gonzalez AM, Baird A. Zebrafish Model of the Blood-Brain Barrier:  
1023 Morphological and Permeability Studies. In: *Methods in Molecular Biology (Clifton,*  
1024 *N.J.)*. Vol 686. ; 2011:371-378. doi:10.1007/978-1-60761-938-3\_18
- 1025 52. Fleming A, Diekmann H, Goldsmith P. Functional Characterisation of the Maturation of  
1026 the Blood-Brain Barrier in Larval Zebrafish. Del Bene F, ed. *PLoS One*.  
1027 2013;8(10):e77548. doi:10.1371/journal.pone.0077548
- 1028 53. Jeong J-Y, Kwon H-B, Ahn J-C, et al. Functional and developmental analysis of the  
1029 blood-brain barrier in zebrafish. *Brain Res Bull*. 2008;75(5):619-628.  
1030 doi:10.1016/J.BRAINRESBULL.2007.10.043
- 1031 54. Xie J, Farage E, Sugimoto M, Anand-Apte B. A novel transgenic zebrafish model for  
1032 blood-brain and blood-retinal barrier development. *BMC Dev Biol*. 2010;10(1):76.  
1033 doi:10.1186/1471-213X-10-76
- 1034 55. Preston E, Hynie I. Transfer constants for blood-brain barrier permeation of the  
1035 neuroexcitatory shellfish toxin, domoic acid. *Can J Neurol Sci*. 1991;18(1):39-44.  
1036 <http://www.ncbi.nlm.nih.gov/pubmed/2036614>. Accessed September 17, 2018.
- 1037 56. Suzuki CAM, Hierlihy SL. Renal clearance of domoic acid in the rat. *Food Chem Toxicol*.  
1038 1993;31(10):701-706. doi:10.1016/0278-6915(93)90140-T
- 1039 57. Lefebvre KA, Noren DP, Schultz IR, Bogard SM, Wilson J, Eberhart BT. Uptake, tissue  
1040 distribution and excretion of domoic acid after oral exposure in coho salmon  
1041 (*Oncorhynchus kisutch*). *Aquat Toxicol*. 2007;81(3):266-274.  
1042 doi:10.1016/j.aquatox.2006.12.009
- 1043 58. Drummond IA, Davidson AJ. Zebrafish Kidney Development. *Methods Cell Biol*.  
1044 2010;100:233-260. doi:10.1016/B978-0-12-384892-5.00009-8
- 1045 59. Drummond IA. Kidney Development and Disease in the Zebrafish. *J Am Soc Nephrol*.  
1046 2005;16:299-304. doi:10.1681/ASN.2004090754
- 1047 60. Panlilio JM, Aluru N, Hahn ME. Early Developmental Exposure to Low Levels of  
1048 Domoic Acid, a Harmful Algal Bloom Toxin, Disrupts Myelination, leading to Behavioral  
1049 Effects. *Toxicol Suppl to Toxicol Sci*. 2019;168(1):Abstract #1691.
- 1050 61. Burtrum D, Silverstein FS. Excitotoxic Injury Stimulates Glial Fibrillary Acidic Protein  
1051 mRNA Expression in Perinatal Rat Brain. *Exp Neurol*. 1993;121(1):127-132.  
1052 doi:10.1006/exnr.1993.1078
- 1053 62. Nielsen AL, Jørgensen AL. Structural and functional characterization of the zebrafish  
1054 gene for glial fibrillary acidic protein, GFAP. *Gene*. 2003;310:123-132.  
1055 doi:10.1016/S0378-1119(03)00526-2
- 1056 63. Lam CS, März M, Strähle U. gfap and nestin reporter lines reveal characteristics of neural  
1057 progenitors in the adult zebrafish brain. *Dev Dyn*. 2009;238(2):475-486.  
1058 doi:10.1002/dvdy.21853
- 1059 64. Hui SP, Nag TC, Ghosh S. Characterization of Proliferating Neural Progenitors after  
1060 Spinal Cord Injury in Adult Zebrafish. Thummel R, ed. *PLoS One*.  
1061 2015;10(12):e0143595. doi:10.1371/journal.pone.0143595

- 1062 65. Grupp L, Wolburg H, Mack AF. Astroglial structures in the zebrafish brain. *J Comp*  
1063 *Neurol.* 2010;518(21):4277-4287. doi:10.1002/cne.22481
- 1064 66. Grenningloh G, Soehrmann S, Bondallaz P, Ruchti E, Cadas H. Role of the microtubule  
1065 destabilizing proteins SCG10 and stathmin in neuronal growth. *J Neurobiol.*  
1066 2004;58(1):60-69. doi:10.1002/neu.10279
- 1067 67. Wen H-L, Lin Y-T, Ting C-H, Lin-Chao S, Li H, Hsieh-Li HM. Stathmin, a microtubule-  
1068 destabilizing protein, is dysregulated in spinal muscular atrophy†. *Hum Mol Genet.*  
1069 2010;19(9):1766-1778. doi:10.1093/hmg/ddq058
- 1070 68. Cheng HW, Jiang T, Mori N, McNeill TH. Upregulation of stathmin (p19) gene  
1071 expression in adult rat brain during injury-induced synapse formation. *Neuroreport.*  
1072 1997;8(17):3691-3695. doi:10.1097/00001756-199712010-00007
- 1073 69. Wen H-L, Ting C-H, Liu H-C, Li H, Lin-Chao S. Decreased stathmin expression  
1074 ameliorates neuromuscular defects but fails to prolong survival in a mouse model of spinal  
1075 muscular atrophy. *Neurobiol Dis.* 2013;52:94-103. doi:10.1016/J.NBD.2012.11.015
- 1076 70. Rice D, Barone S. Critical periods of vulnerability for the developing nervous system:  
1077 evidence from humans and animal models. *Environ Health Perspect.* 2000;108 Suppl:511-  
1078 533. doi:10.1289/ehp.00108s3511
- 1079 71. Tanaka S, Mito T, Takashima S. Progress of myelination in the human fetal spinal nerve  
1080 roots, spinal cord and brainstem with myelin basic protein immunohistochemistry. *Early*  
1081 *Hum Dev.* 1995;41(1):49-59. doi:10.1016/0378-3782(94)01608-R
- 1082 72. Kinney HC, Volpe JJ. Myelination Events. In: *Volpe's Neurology of the Newborn.*  
1083 Elsevier; 2018:176-188. doi:10.1016/B978-0-323-42876-7.00008-9
- 1084 73. Kinney HC, Ann brody B, Kloman AS, Gilles FH. Sequence of Central Nervous System  
1085 Myelination in Human Infancy. II. Patterns of Myelination in Autopsied Infants. *J*  
1086 *Neuropathol Exp Neurol.* 1988;47(3):217-234. doi:10.1097/00005072-198805000-00003
- 1087 74. Fields RD. Myelination: an overlooked mechanism of synaptic plasticity? *Neuroscientist.*  
1088 2005;11(6):528-531. doi:10.1177/1073858405282304
- 1089 75. Pajevic S, Bassar PJ, Fields RD. Role of myelin plasticity in oscillations and synchrony of  
1090 neuronal activity. *Neuroscience.* 2014;276:135-147.  
1091 doi:10.1016/j.neuroscience.2013.11.007
- 1092 76. Wang GJ, Schmued LC, Andrews AM, Scallet AC, Slikker W, Binienda Z. Systemic  
1093 administration of domoic acid-induced spinal cord lesions in neonatal rats. *J Spinal Cord*  
1094 *Med.* 2000;23(1):31-39. <http://www.ncbi.nlm.nih.gov/pubmed/10752872>. Accessed April  
1095 22, 2015.
- 1096 77. Teitelbaum JS, Zatorre RJ, Carpenter S, et al. Neurologic Sequelae of Domoic Acid  
1097 Intoxication Due to the Ingestion of Contaminated Mussels. *N Engl J Med.*  
1098 1990;322(25):1781-1787. doi:10.1056/NEJM199006213222505
- 1099 78. Petroff R, Richards T, Crouthamel B, et al. Chronic, Low-Level Oral Exposure to Marine  
1100 Toxin, Domoic Acid, Alters Whole Brain Morphometry in Nonhuman Primates.  
1101 *Neurotoxicology.* 2019. doi:10.1101/439109
- 1102 79. Adams AL, Doucette TA, Ryan CL. Altered pre-pulse inhibition in adult rats treated  
1103 neonatally with domoic acid. *Amino Acids.* 2008;35(1):157-160. doi:10.1007/s00726-007-  
1104 0603-3
- 1105 80. Marriott AL, Ryan CL, Doucette TA. Neonatal domoic acid treatment produces alterations  
1106 to prepulse inhibition and latent inhibition in adult rats. *Pharmacol Biochem Behav.*  
1107 2012;103(2):338-344. doi:10.1016/j.pbb.2012.08.022

- 1108 81. Zuloaga DG, Lahvis GP, Mills B, Pearce HL, Turner J, Raber J. Fetal domoic acid  
1109 exposure affects lateral amygdala neurons, diminishes social investigation and alters  
1110 sensory-motor gating. *Neurotoxicology*. 2016;53:132-140.  
1111 doi:10.1016/J.NEURO.2016.01.007
- 1112 82. Koch M. The neurobiology of startle. *Prog Neurobiol*. 1999;59(2):107-128.  
1113 <http://www.ncbi.nlm.nih.gov/pubmed/10463792>. Accessed May 1, 2015.
- 1114 83. Eaton RC, Lee RKK, Foreman MB. The Mauthner cell and other identified neurons of the  
1115 brainstem escape network of fish. *Prog Neurobiol*. 2001;63(4):467-485.  
1116 doi:10.1016/S0301-0082(00)00047-2
- 1117 84. Yeomans JS, Frankland PW. The acoustic startle reflex: neurons and connections. *Brain*  
1118 *Res Rev*. 1995;21(3):301-314. doi:10.1016/0165-0173(96)00004-5
- 1119 85. Bernard PB, MacDonald DS, Gill DA, Ryan CL, Tasker RA. Hippocampal mossy fiber  
1120 sprouting and elevated trkB receptor expression following systemic administration of low  
1121 dose domoic acid during neonatal development. *Hippocampus*. 2007;17(11):1121-1133.  
1122 doi:10.1002/hipo.20342
- 1123 86. Ryan CL. Hippocampal mossy fiber sprouting and elevated trkB receptor expression  
1124 following systemic administration of low dose domoic acid during neonatal development.  
1125 2007. doi:10.1002/hipo.20342
- 1126 87. Gill DA, Bastlund JF, Watson WP, Ryan CL, Reynolds DS, Tasker RA. Neonatal  
1127 exposure to low-dose domoic acid lowers seizure threshold in adult rats. *Neuroscience*.  
1128 2010;169(4):1789-1799. doi:10.1016/j.neuroscience.2010.06.045.
- 1129 88. Tasker RAR, Perry MA, Doucette TA, Ryan CL. NMDA receptor involvement in the  
1130 effects of low dose domoic acid in neonatal rats. *Amino Acids*. 2005;28(2):193-196.  
1131 doi:10.1007/s00726-005-0167-z
- 1132 89. Jing J, Petroff R, Shum S, et al. Toxicokinetics and Physiologically Based  
1133 Pharmacokinetic Modeling of the Shellfish Toxin Domoic Acid in Nonhuman Primates.  
1134 *Drug Metab Dispos*. 2018;46:155-165. doi:10.1124/dmd.117.078485
- 1135 90. Kucenas S, Snell H, Appel B. nkx2.2a promotes specification and differentiation of a  
1136 myelinating subset of oligodendrocyte lineage cells in zebrafish. *Neuron Glia Biol*.  
1137 2008;4(2):71-81. doi:10.1017/S1740925X09990123
- 1138 91. Takada N, Kucenas S, Appel B. Sox10 is necessary for oligodendrocyte survival  
1139 following axon wrapping. *Glia*. 2010;58(8):996-1006. doi:10.1002/glia.20981
- 1140 92. Cianciolo Cosentino C, Roman BL, Drummond IA, Hukriede NA. Intravenous  
1141 microinjections of zebrafish larvae to study acute kidney injury. *J Vis Exp*. 2010;(42).  
1142 doi:10.3791/2079
- 1143 93. Halekoh U, Højsgaard S, Yan J. The R Package **geepack** for Generalized Estimating  
1144 Equations. *J Stat Softw*. 2006;15(2):1-11. doi:10.18637/jss.v015.i02
- 1145 94. Wolman MA, Jain RA, Liss L, Granato M. Chemical modulation of memory formation in  
1146 larval zebrafish. *Proc Natl Acad Sci U S A*. 2011;108(37):15468-15473.  
1147 doi:10.1073/pnas.1107156108
- 1148 95. Burgess HA, Granato M. Modulation of locomotor activity in larval zebrafish during light  
1149 adaptation. *J Exp Biol*. 2007;210(Pt 14):2526-2539. doi:10.1242/jeb.003939
- 1150 96. Bates D, Mächler M, Bolker B, Walker S. Fitting Linear Mixed-Effects Models using  
1151 lme4. June 2014. <http://arxiv.org/abs/1406.5823>. Accessed December 25, 2018.
- 1152 97. Hothorn T, Bretz F, Westfall P. *The Multcomp Package Title Simultaneous Inference for*  
1153 *General Linear Hypotheses.*; 2007.

- 1154 <http://132.180.15.2/math/statlib/R/CRAN/doc/packages/multcomp.pdf>. Accessed  
1155 December 25, 2018.
- 1156 98. Benaglia T, Chauveau D, Hunter D, Young D. mixtools: An R Package for Analyzing  
1157 Finite Mixture Models. *J Stat Softw.* 2009;32(6):1-29. [https://hal.archives-ouvertes.fr/hal-](https://hal.archives-ouvertes.fr/hal-00384896/)  
1158 00384896/. Accessed December 25, 2018.
- 1159 99. O'Malley DM, Kao YH, Fetcho JR. Imaging the functional organization of zebrafish  
1160 hindbrain segments during escape behaviors. *Neuron.* 1996;17(6):1145-1155.  
1161 <http://www.ncbi.nlm.nih.gov/pubmed/8982162>. Accessed January 29, 2015.
- 1162 100. Marsden KC, Granato M. In Vivo Ca(2+) Imaging Reveals that Decreased Dendritic  
1163 Excitability Drives Startle Habituation. *Cell Rep.* 2015;13(9):1733-1740.  
1164 doi:10.1016/j.celrep.2015.10.060
- 1165 101. Konietzschke F, Placzek M, Schaarschmidt F, Hothorn LA. **nparcomp** : An R Software  
1166 Package for Nonparametric Multiple Comparisons and Simultaneous Confidence  
1167 Intervals. *J Stat Softw.* 2015;64(9). doi:10.18637/jss.v064.i09
- 1168 102. Wobbrock JO, Findlater L, Gergle D, Higgins JJ. The aligned rank transform for  
1169 nonparametric factorial analyses using only anova procedures. In: *Proceedings of the 2011*  
1170 *Annual Conference on Human Factors in Computing Systems - CHI '11*. New York, New  
1171 York, USA: ACM Press; 2011:143. doi:10.1145/1978942.1978963
- 1172 103. Rosario-Martinez H De, Fox J, Team RC. Post-Hoc Interaction Analysis [R package phia  
1173 version 0.2-1]. <https://cran.r-project.org/web/packages/phia/index.html>. Accessed  
1174 December 25, 2018.
- 1175 104. Ripley B, Venables W. *Package "Nnet."*; 2016. <http://www.stats.ox.ac.uk/pub/MASS4/>.  
1176 Accessed February 7, 2019.
- 1177 105. Fox J, Weisberg S, Price B, et al. Package "car." In: *An R Companion to Applied*  
1178 *Regression*. SAGE Publications; 2018.  
1179 <ftp://ftp.math.ethz.ch/sfs/pub/Software/CRAN/web/packages/car/car.pdf>. Accessed  
1180 February 7, 2019.
- 1181 106. Andrews S. FastQC: a quality control tool for high throughput sequence data.
- 1182 107. Bolger AM, Lohse M, Usadel B. Trimmomatic: a flexible trimmer for Illumina sequence  
1183 data. *Bioinformatics.* 2014;30(15):2114-2120. doi:10.1093/bioinformatics/btu170
- 1184 108. Dobin A, Davis CA, Schlesinger F, et al. STAR: ultrafast universal RNA-seq aligner.  
1185 *Bioinformatics.* 2013;29(1):15-21. doi:10.1093/bioinformatics/bts635
- 1186 109. Anders S, Pyl PT, Huber W. HTSeq—a Python framework to work with high-throughput  
1187 sequencing data. *Bioinformatics.* 2015;31(2):166-169. doi:10.1093/bioinformatics/btu638
- 1188 110. Robinson MD, McCarthy DJ, Smyth GK. edgeR: a Bioconductor package for differential  
1189 expression analysis of digital gene expression data. *Bioinformatics.* 2010;26(1):139-140.  
1190 doi:10.1093/bioinformatics/btp616
- 1191 111. Chen Y, Lun ATL, Smyth GK. From reads to genes to pathways: differential expression  
1192 analysis of RNA-Seq experiments using Rsubread and the edgeR quasi-likelihood  
1193 pipeline. *F1000Research.* 2016;5:1438. doi:10.12688/f1000research.8987.2
- 1194 112. Reimand J, Arak T, Adler P, et al. g:Profiler—a web server for functional interpretation of  
1195 gene lists (2016 update). *Nucleic Acids Res.* 2016;44(W1):W83-W89.  
1196 doi:10.1093/nar/gkw199
- 1197 113. Zhang Y, Kecskés A, Copmans D, et al. Pharmacological characterization of an antisense  
1198 knockdown zebrafish model of Dravet syndrome: Inhibition of epileptic seizures by the  
1199 serotonin agonist fenfluramine. *PLoS One.* 2015;10(5). doi:10.1371/journal.pone.0125898
